1 **Title:**

2 Generation and utilization of a HEK-293T murine GM-CSF expressing cell line

3 **Authors:**

4 Elektra K. Robinson<sup>¶</sup>, Sergio Covarrubias<sup>¶</sup>, Simon Zhou<sup>¶</sup>, Susan Carpenter<sup>1\*</sup>

5 <sup>1</sup>Department of Molecular, Cell and Developmental Biology, University of California Santa

6 Cruz, 1156 High St, Santa Cruz, CA 95064

7 ¶ Authors contributed equally to this work

8 \* Corresponding authors: Susan Carpenter (sucarpen@ucsc.edu)

9 **Abstract:**

10 Macrophages and dendritic cells (DCs) are innate immune cells that play a key role in defense against pathogens.  
11 *In vitro* cultures of bone marrow-derived macrophages (BMDMs) and dendritic cells (BMDCs) are well-established  
12 and valuable methods for immunological studies. Typically, commercially available recombinant GMCSF is  
13 utilized to generate BMDCs and is also used to culture alveolar macrophages. We have generated a new HEK-293T  
14 cell line expressing murine GM-CSF that secretes high levels of GM-CSF (~180ng/ml) into complete media as an  
15 alternative to commercial GM-CSF. Differentiation of dendritic cells and expression of various markers were  
16 kinetically assessed using the GM-CSF HEK293T cell line, termed supGM-CSF and compared directly to purified  
17 commercial GMCSF. After 7-9 days of cell culture the supGM-CSF yielded twice as many viable cells compared  
18 to the commercial purified GM-CSF. In addition to differentiating BMDCs, the supGM-CSF can be utilized to  
19 culture alveolar macrophages without an altering inflammatory activation cascade. Collectively, our results show  
20 that supernatant from our GM-CSF HEK293T cell line supports the differentiation of mouse BMDCs or alveolar  
21 macrophage culturing, providing an economical alternative to purified GM-CSF.

22 **Introduction:**

23 Colony-stimulating factors (CSF) including macrophage colony-stimulating factor (M-CSF), granulocyte  
24 colony-stimulating factor (G-CSF), and granulocyte-macrophage colony stimulating factor (GM-CSF) are crucial  
25 for survival, proliferation, differentiation and functional activation of hematopoietic cells, including macrophages  
26 and dendritic cells (DCs) (1). Macrophages and DCs are innate immune cells found in tissues and lymphoid organs

27 that play a key role in defense against pathogens (2). While there are a multitude of macrophage and dendritic cell  
28 subsets, GM-CSF is critical for the development of conventional dendritic cells (cDCs) and alveolar macrophages  
29 (AMs) (2). Due to cell number limitations from harvesting cDCs and AMs directly from mice, well-established *in*  
30 *vitro* culturing of bone marrow and bronchoalveolar lavage fluid for dendritic cells and alveolar macrophages,  
31 respectively, using GM-CSF have become invaluable for immunological and molecular biology studies (2). This  
32 has led to the use of CSF proteins in the purified form, as well as to the generation of recombinant cell lines that  
33 secrete the desired protein in the supernatant for cost efficiency (3–6). One of the most widely adapted cell lines,  
34 utilized for differentiating and culturing murine bone-marrow derived macrophages (BMDMs) is the NCTC clone  
35 929 strain L line, also known as L929 (7). Supernatant from cultured L929 can be utilized, in lieu of purified M-  
36 CSF, to culture and differentiated BMDMs because it secretes murine M-CSF (7).

37 The Human embryonic kidney 293T (HEK293T) cell line is the ideal choice for expressing a CSF protein  
38 for differentiating primary immune cells from mouse bone marrow as it has been shown not to express innate  
39 immune pattern recognition receptors or naturally secrete immune-related cytokines (8, 9). This ensures that it is  
40 predominantly only your protein of choice being expressed and that there is no inadvertent activation of the  
41 inflammatory cascade. Previously, murine GM-CSF has been cloned into J558L, a mouse B myeloma cell line (4),  
42 which is known to express cytokines, including IL-10 (10). Using J558L can therefore alter the results of *in vitro*  
43 experiments, by activating anti-inflammatory pathways when cultured with BMDCs or alveolar macrophages.

44 In this study we constructed HEK293T cell lines stably expressing and secreting murine GM-CSF. We  
45 utilized GM-CSF to generate and culture BMDCs and alveolar macrophages (AMs). HEK293T cells have no  
46 expression of human GM-CSF and the constructed cell lines thus express only the stably transfected gene of murine  
47 GM-CSF. We have found that our line is very stable, producing GM-CSF at a concentration of ~200ng/ml even  
48 following freeze thaw cycles of the line. We differentiated BMDCs and cultured AMs using our supGM-CSF and  
49 compared them to commercially available purified GM-CSF (pGM-CSF) and found that our supGM-CSF yields a  
50 higher number of cells, purity of DCs is not altered, and have an intact immune signaling cascades.

## 51 ***Materials and Methods***

### 52 *Cloning Strategy of mGM-CSF*

53 The mGM-CSF gene, including PspXI and NotI restriction sites, was amplified from the pCR3.1-mGM-CSF vector  
54 (Addgene, 74465). The PCR was set up with:  
55 25  $\mu$ l 2X Phusion High-Fidelity PCR Master Mix (Thermo Scientific), 1  $\mu$ l PspXI\_hMCSF\_fwd (20mM):  
56 TCCGCTCGAGCCACCATGTGGCTGCAGAATTTACTTTTCC, 1  $\mu$ l NotI\_hMCSF\_rev (20mM):  
57 GACGCGGCCGCTCATTTTTGGCCTGGTTTTTTGC, 1  $\mu$ l pCR3.1-mGM-CSF (20ng) and 22  $\mu$ l DEP-C  
58 nuclease-free water. PCR program: 95°C 3 minutes, 35 cycles of 95°C 30 sec, 60°C 30 sec, and 72°C 1 min, and  
59 end the PCR with 72°C and 12°C hold. The PCR product was purified using the PCR Clean-up Kit (Macherey-  
60 Nagel) and was subsequently digested with PspXI (New England BioLabs) and NotI-HF (New England BioLabs)  
61 using recommended digestion conditions (<https://nebcloner.neb.com/#!/redigest>) and was cloned into our custom  
62 681 bidirectional lentiviral vector (sequence in supplemental). Sequence was confirmed by Sequetech (Sanger)  
63 sequencing.

#### 64 Lentivirus Generation

65 HEK-293T cells (4e5 cells/well) were plated onto a 6-well plate (353046, Corning) with complete DMEM [10%  
66 heat-inactivated FCS (Gibco, 26140-079), 100 $\mu$ g/ml penicillin (Thermo, 15140122), and 100 $\mu$ g/ml streptomycin  
67 (Thermo, 15140122)]. 24hr later, 500 ng of 681-mGM-CSF or empty vector control, 250ng psPAX2 (Addgene,  
68 12260), and 250ng pMD2.G (Addgene, 12259) were mixed in 200 $\mu$ l of serum-free Opti-MEM (Gibco) and 5 $\mu$ l  
69 Lipofectamine 2000 (Thermo Fisher) was added to mix and incubated for 20 minutes at room temperature.  
70 Transfection reaction was added to HEK-293T cells and allowed to transfect for 72 hours, and supernatant was  
71 harvested, passed through 0.45 $\mu$ m filters (Millipore, Stericup), and aliquots were stored at -80°C.

#### 72 Construction of GM-CSF-producing HEK-293T Cells

73 HEK-293T cells were transduced 2 days with 200 $\mu$ l of lentivirus per 1e5 cells. 48hrs after infection, the HEK-293T  
74 cells were selected with puromycin (2 $\mu$ g/ml) for >3 days, monitoring viability and increase of mCherry expression  
75 using FACS (Attune NxT Flow Cytometer). Once mCherry expression exceeded 85%, puromycin was removed,  
76 and cell-line was expanded and used to produce GM-CSF. A detailed method for GM-CSF supernatant production  
77 is described in extended methods.

#### 78 Enrichment of DCs and Macrophages from BM and in-vitro stimulation

79 Bone marrow (BM) cells were harvested from the femurs and tibia of wild-type C57BL/6 between 6- and 18-weeks  
80 old mice and depleted of erythrocytes.  $1 \times 10^6$ - $3 \times 10^6$  BM cells were plated per well of a 6-well tissue culture plate  
81 (353046, Corning) in complete DMEM supplemented with either 10% M-CSF from L929 cells, 5-10% supernatant,  
82 or 10-25ng/ml of recombinant mGM-CSF [PMC2015, Thermo Fisher]. Media was replaced on day 3 and every 2  
83 days henceforward. Cells were scraped and moved onto a larger plate as they proliferated. After 7 to 14 days of  
84 enrichment, cells were stimulated by adding 200ug/ml LPS (Sigma, L2630-10MG) to the media and harvested for  
85 analysis after 0, 6, or 24 hours of stimulation. Total cell count was determined by staining cells with trypan blue  
86 and using a Light Microscope and hemocytometer.

#### 87 Surface Staining for Flow Cytometry

88 Stimulated BMDCs and BMDMs were harvested and centrifuged at 300 g for 5 minutes. The pellets were  
89 resuspended in 100 $\mu$ l sorting media (2% FCS, 5 mM EDTA, 1X PBS). Each sample was blocked with 100 $\mu$ l of Fc  
90 block CD16/CD32 (BD Biosciences) diluted 1:250 in sorting media and incubated at room temperature for 15  
91 minutes. Antibodies and viability dye were then used to stain the samples for 30 minutes on ice in the dark.  
92 Antibodies and dye: APC-eFluor 780 anti-CD45 (Invitrogen, 47-0451-82), Alexa-Fluor 700 anti-CD11c (BD  
93 Pharmingen, 560583), FITC anti-CD11b (Thermo Fisher, MA1-10081), PE-eFluor 610 anti-F4/80 (eBioScience,  
94 61-4801-80), PE anti-MHC Class II (BD Pharmingen, 562010), and Fixable Aqua Dead Cell Stain (Thermo Fisher,  
95 L34957). Cells were washed twice in 1 ml sorting media, spinning at 300 g for 5 minutes. The resulting pellet was  
96 resuspended in 200 $\mu$ l of sorting media and analyzed by FACS (Attune NxT Flow Cytometer).

#### 97 Inflammasome Activation Assay and ELISA

98 supGM-CSF (25ng/ml) or recGM-CSF (25ng/ml) differentiated BMDCs were plated at  $2 \times 10^5$  cells/well in a 96 well  
99 plate with complete DMEM media. Cells were first primed with 200ng/ml LPS for 3h prior to treatment with  
100 different agents. Poly(dA:dT) DNA (dsDNA mimic) was transfected using Lipofectamine 2000 at a concentration  
101 of 1.5 $\mu$ g/ml, 6hrs prior to harvesting supernatant. The supernatant was harvested using a p300 multichannel pipette  
102 and stored at -80°C. Commercial ELISAs were used to measure the following analytes in triplicate mice following  
103 the manufacturer's instructions: IL-6 (mouse IL-6 DuoSet, R&D Systems DY406) and IL-1 $\beta$  (Mouse IL-1 $\beta$ /IL-1F2  
104 R&D Systems DY401-05).

105 BALF Harvest and Alveolar Macrophage Culturing

106 Bronchoalveolar Lavage Fluid (BALF) was harvested as previously stated by Cloonan *et al.* (PMID:26752519). 40  
107 mice were euthanized by CO<sub>2</sub> narcosis, the tracheas cannulated, and the lungs lavaged with 0.5-ml increments of  
108 ice-cold PBS eight times (4 ml total), samples were combined in 50ml conical tubes. BALF was centrifuged at 500g  
109 for 5 min. 1 ml red blood cell lysis buffer (Sigma-Aldrich) was added to the cell pellet and left on ice for 5 min  
110 followed by centrifugation at 500g for 5 min. The cell pellet was resuspended in 500 $\mu$ l PBS, and leukocytes were  
111 counted using a hemocytometer. Specifically, 10 $\mu$ l was removed for cell counting (performed in triplicate) using a  
112 hemocytometer. Cells were plated in sterile 12 well plates at 5e5/well (total of 8 wells) and use complete DMEM  
113 with 25ng/ml supGM-CSF.

114 Culturing of Alveolar Macrophages

115 24hrs post-BALF isolation, media was removed and fresh complete DMEM with 25ng/ml supGM-CSF is added.  
116 All cells that adhere to the surface of the plate are considered alveolar macrophages (AM) as previously determined  
117 by Chen *et al.* (PMID:3288696). After new media is added, AMs are stimulated with 200ng/ml LPS (Sigma, L2630-  
118 10MG). Harvest supernatant 6hrs post-stimulation. Harvested supernatant was sent to Eve technologies for cytokine  
119 analysis. Statistics were performed using GraphPad prism.

120 Cytotoxicity Assay

121 Cytotoxicity was assessed by measuring the release of LDH into the media (LDH-Cytotoxicity Colorimetric Assay  
122 Kit II; BioVision) according to the manufacturer's protocol.

123 Results:

124 Production of a murine GM-CSF-secreting HEK-293T cell line

125 A murine GM-CSF (mGM-CSF) containing plasmid (Addgene, 74465) was used as a template to amplify mGM-  
126 CSF, which we inserted into a plasmid with a pSico backbone (SFig1, Supplemental File). The vector contains a  
127 bidirectional EF1a promoter driving puromycin resistance gene and mCherry on one side and mGM-CSF on the  
128 other (SFig1B, Fig1A). Lentivirus containing mGM-CSF, or a control construct was generated and transduced into  
129 HEK293Ts and monitored using flow cytometry (SFig2). Post puromycin selection for 7 days, our control and  
130 mGM-CSF constructs were incorporated into the genomes of HEK293T cells (at a rate of >85%) (Fig1B). In order

131 to determine how much GM-CSF was being produced by the HEK293T line we plated and grew  $2 \times 10^6$  cells for 3  
132 days, isolated the supernatant and performed an ELISA to measure the concentration which was found to be  
133 181.7ng/ml (Extended Methods). The cell line was subsequently frozen down into aliquots and thawed to assess  
134 stability. Protein secretion was assessed again, by ELISA, and the stock secreted mGM-CSF at  $181.9 \pm \text{ng/ml}$   
135 (Fig1C). There was no significant difference between the concentration of mGM-CSF in the supernatant of the  
136 initial or the freeze thawed HEK293T cell line indicating that the line is stable.

137 *Bone-Marrow Cells differentiated with supGM-CSF yield a higher number of Dendritic Cells compared to pGM-*  
138 *CSF*

139 To assess the efficacy of the mGM-CSF-rich supernatant (supGM-CSF), bone marrow (BM) cells were treated with  
140 10ng/ml or 25 ng/ml of supGM-CSF and compared to the same concentrations of a commercially obtained purified  
141 GM-CSF (pGM-CSF) (11–13). As a control for differentiation, we also generated bone-marrow derived  
142 macrophages (BMDMs) using supM-CSF obtained from L929 cells (14) (Fig2A).

143 Cells incubated with M-CSF, pGM-CSF and supGM-CSF were fully differentiated by day 7 and could be cultured  
144 until day 14 (Fig2A). Morphologically, BM differentiated with supGM-CSF and pGM-CSF, at either 10ng/ml or  
145 25ng/ml, have a more stellate morphology as is expected in dendritic cells compared to M-CSF differentiated  
146 macrophage cells. There is no morphological difference between pGM-CSF or supGM-CSF differentiated cells, at  
147 either 10ng/ml or 25ng/ml (Fig 2B). At day 9 of differentiation, cells were harvested and counted. When comparing  
148 the pGM-CSF to the supGM-CSF, supGM-CSF yields significantly more viable cells in comparison to pGM-CSF  
149 (Fig 2C). After culture with M-CSF, pGM-CSF or supGM-CSF, cells were assessed for purity by flow cytometry  
150 based on previously published panels (15, 16). After gating on Live+/CD45+/CD11b+ cells purity was determined  
151 based on the proportion of the population expressing CD11c and F4/80, shown as a quadrant (SFig3, Fig2D-H).  
152 Percent of cells in quadrant 2 (F4/80+ and CD11c+) was significantly higher for all GM-CSF treated cells, in  
153 comparison to M-CSF treated cells, as is expected since CD11c is a dendritic cell marker. However, pGM-CSF and  
154 supGM-CSF were not significantly different (Fig2 I). As expected, the mean fluorescence intensity for dendritic  
155 cell marker CD11c+ cells was significantly higher for all GM-CSF treated cells in comparison to M-CSF (Fig2 J),  
156 while F4/80+ expression was equal for every treatment (Fig2 K). While supGM-CSF is able to generate more viable

157 cells than pGM-CSF, there is no significant difference in cellular purity between supGM-CSF and pGM-CSF (both  
158 at ~85% purity).

159 *BMDCs generated using supGM-CSF function as efficiently as BMDCs generated using pGM-CSF*

160 Dendritic cells are the professional antigen presenting cells of the immune system. In order to test the ability of our  
161 supGM-CSF to generate functional DCs we measured their levels of MHC-Class II expression using flow cytometry  
162 (17). M-CSF differentiated cells express little MHC class II, while pGM-CSF and supGM-CSF express robust levels  
163 of MHC class II, when differentiated with 10ng/ml or 25ng/ml concentration of GM-CSF (Fig3A-B, SupFig3A-B).  
164 Dendritic cells differentiated with 10ng/ml GM-CSF show statistically higher mean fluorescence intensity for MHC  
165 class II for supGM-CSF in comparison to pGM-CSF (SFig.4 C). Interestingly, dendritic cells differentiated with  
166 25ng/ml of either pGM-CSF or supGM-CSF exhibit no significant difference in MHC class II protein expression  
167 when evaluated by mean fluorescence intensity (Fig.3 C). In addition to assessing MHC Class II levels, we also  
168 assessed the ability of the pGM-CSF and supGM-CSF BMDCs to respond to inflammatory stimulation. Both pGM-  
169 CSF and supGM-CSF BMDCs were stimulated with LPS (200ng/ml) for the indicated time course and IL6 mRNA  
170 expression was measured by quantitative PCR (qPCR) (Fig.3 C). Thus, determining that the supGM-CSF derived  
171 cells maintain their inflammatory activity. Finally, AIM2 inflammasome activity was measured through IL6 and  
172 IL1b protein secretion of both purified and supernatant GM-CSF. Here we observe that supGM-CSF produces  
173 significantly higher expression of IL6 and IL1b (Fig.3 D-E) suggesting that these dendritic cells are more sensitive  
174 to inflammatory activation compared to DCs generated using pGM-CSF.

175 *supGM-CSF can maintain viable and inflammatory inducible Alveolar Macrophages*

176 mGM-CSF is a critical protein factor that is not only necessary for driving primary dendritic cell differentiation,  
177 but also for maintaining primary alveolar macrophages (AM) in culture (18, 19). To test the ability of supGM-CSF  
178 to maintain AM in culture, we harvested bronchiolar lavage fluid (BALF) from 10 WT wild-type mice. We pooled  
179 these cells, counted and then plated them in 25ng/ml supGM-CSF supplemented media. 24 h post-harvest, using a  
180 light microscope, we tested that AMs attached (Fig. 4). Viability of AMs were assessed by measuring the amount  
181 of lactate dehydrogenase (LDH) in the media. The amount of measured LDH correlates directly with the cell number  
182 lysed (20). Our data indicate that supGM-CSF does not negatively affect the cell culture, while the controls indicate

183 there are healthy cultured cells not resistant to apoptosis (Fig.4 B). AMs were stimulated with LPS for 24 hr and  
184 cytokines were measured by ELISA. Inflammatory inducible proteins are significantly upregulated in AMs cultured  
185 in supGM-CSF media, including proteins IL6, TNF $\alpha$ , MDC, MCP-1, IP10, KC and Rantes (Fig.4 C-I). supGM-  
186 CSF cultured primary alveolar macrophages maintain their pro-inflammatory activation programming.

### 187 **Discussion:**

188 Dendritic cells and macrophages have been cultured and studied for the last 40 years, leading to many  
189 advances in culturing protocols. Flt3L is often utilized as a factor for BMDC differentiation, it is now appreciated  
190 that Flt3L DCs are representative of steady-state resident DCs, while GM-CSF BMDCs mirror the transcriptional  
191 programming of pro-inflammatory recruited cells (21, 22). Granulocyte-macrophage colony-stimulating factor (GM-  
192 CSF), differentiated bone marrow cells are widely used as a model system for conventional DC development (23,  
193 24), as well as sustaining primary alveolar macrophages in culture (25). Current strategies for the generation of  
194 murine BMDCs or culturing of primary alveolar macrophages utilize store bought purified recombinant GM-CSF  
195 or a stable cell-line expressing recGM-CSF called J558L (10). J558L, a murine GM-CSF, secreting cell-line is  
196 utilized for both BMDC and alveolar macrophage culturing, however it is an immune cell that also secretes IL-10  
197 which can alter the transcriptional programming of the cells when culturing and only secretes 80ng/ml (10, 18, 19).

198 Using supernatant from GM-CSF secreting HEK293T cells, can serve as an alternative to purified GM-  
199 CSF for murine BMDCs or maintenance of primary alveolar macrophages. We have successfully cloned and stably  
200 integrated murine GM-CSF into HEK293T cells, which consistently secrete 180ng/ml of GM-CSF (Fig. 1). Bone  
201 marrow differentiated with our supGM-CSF produces more cells by day 9 compared to pGM-CSF, but both GM-  
202 CSF sources generate an equal percentage of pure dendritic cells based on previously published gating strategies  
203 (15, 16) (Fig1C and I). Additionally, using more GM-CSF also will produce more viable and proliferating cells,  
204 which can be further enhanced with higher concentrations of supGM-CSF (Fig2C). Commercial GM-CSF can be  
205 used instead of our HEK293T supGM-CSF, but it is expensive, and GM-CSF has to be added every 2 days to cells  
206 during the differentiation process. Our supGM-CSF is much more cost effective compared to purified GM-CSF  
207 from a number of companies (Supplemental Table 1). From one harvest of supGM-CSF you can generate ~10 ug,  
208 which will be the cost of 50ml of complete media (Extended Methods), while 10 ug of purified GM-CSF from



209 Thermo Fisher will cost \$276. The purity of BMDCs generated from pGM-CSF and supGM-CSF does not differ  
210 when assessed by flow cytometry based on previously published panels (15, 16) (SFig3, Fig2D-H).

211 DCs are professional antigen presenting cells and therefore express high levels of MHC Class II (21, 26).  
212 BMDCs differentiated with either Flt3L or GM-CSF have comparable T cell activation, and therefore MHC II  
213 expression (22). BMDCs differentiated with either pGM-CSF or supGM-CSF express MHC-II at a comparable  
214 level, when measured by mean fluorescence through flow cytometry (Fig3A-C).

215 As previously stated, picking a cell line to express a recombinant protein is very important. If an immune  
216 cell is chosen, one risks the chance of having immune factors being secreted in the supernatant, leading to priming  
217 and activation of either pro- or anti- inflammatory transcriptional programs (10, 18, 19). By performing a time-  
218 course stimulation or overnight LPS stimulation, our study indicates supGM-CSF does not inhibit the inflammatory  
219 program transcriptionally when measuring the transcript or protein level of IL6 (Fig 3D-E). supGM-CSF and pGM-  
220 CSF differentiated BMDCs both retain the ability to activate the inflammasome pathway, leading to the secretion  
221 of IL1b (Fig3D-F), while this pathway is now contested in DCs our results for GM-CSF is true (27).

222 Not only does our study provide data to support the use of supGM-CSF compared to pGM-CSF for BMDCs,  
223 but we also show that supGM-CSF can be utilized to sustain the culturing of primary alveolar macrophages from  
224 murine bronchoalveolar lavage fluid (BALF) (10, 18). After 48 h of supGM-CSF cultured BALF, the adhered  
225 alveolar macrophages (AMs) were >95% viable (Fig4B). More importantly, when stimulating the cells with LPS  
226 overnight cytokines such as IL6, TNFa, KC and Rantes were all inducible (Fig. 4C-I). Thus, supGM-CSF maintains  
227 AMs in culture and does not inhibit the pro-inflammatory programming of the immune cells.

228 Taken together our results show that a pure BMDC population and inflammatory inducible DCs or AMs  
229 can be established by culturing BM cells or BALF with a crude supernatant from our GM-CSF HEK293T cell line.  
230 This line will provide the research community with a more cost-effective alternative to commercially available GM-  
231 CSF.

### 232 **Funding**

233 This work was supported by R21AR070973.

### 234 **Author Contributions:**

235 SCo and SCa has designed the study and cell line. EKR has analyzed data for all figures. SZ has performed all flow  
236 cytometry for figures 1, 2 and 3. SZ has characterized the cell line and generated extended methods. EKR has  
237 personally performed experiments for data used in Figure 3 and 4 and supplemental figure 3 and table. EKR has  
238 written and edited manuscript. SCa, SCo, SZ have edited manuscript. SCa has provided necessary funding for  
239 project.

240 **Competing Interests:**

241 There are no competing interests.

242 **Data and Materials Availability:**

243 Our vector maps are available in supplemental materials.

244

- 245 1. D. Metcalf, Hematopoietic cytokines. *Blood*. **111**, 485–491 (2008).
- 246 2. B. Becher, S. Tugues, M. Greter, GM-CSF: From Growth Factor to Central Mediator of Tissue Inflammation.  
247 *Immunity*. **45**, 963–973 (2016).
- 248 3. S. C. Almo, J. D. Love, Better and faster: improvements and optimization for mammalian recombinant  
249 protein production. *Curr. Opin. Struct. Biol.* **26**, 39–43 (2014).
- 250 4. H. Karasuyama, F. Melchers, Establishment of mouse cell lines which constitutively secrete large quantities  
251 of interleukin 2, 3, 4 or 5, using modified cDNA expression vectors. *Eur. J. Immunol.* **18**, 97–104 (1988).
- 252 5. Y. Kiselev, T. E. Eriksen, S. Forsdahl, L. H. T. Nguyen, I. Mikkola, 3T3 cell lines stably expressing Pax6 or  
253 Pax6(5a)--a new tool used for identification of common and isoform specific target genes. *PLoS ONE*. **7**,  
254 e31915 (2012).
- 255 6. D. Klose, M. Weitok, J. Niesen, R. R. Beerli, U. Grawunder, R. Fischer, S. Barth, R. Fendel, T. Nachreiner,  
256 Generation of an artificial human B cell line test system using Transpo-mAb<sup>TM</sup> technology to evaluate the  
257 therapeutic efficacy of novel antigen-specific fusion proteins. *PLoS ONE*. **12**, e0180305 (2017).
- 258 7. G. Boltz-Nitulescu, C. Wiltschke, C. Holzinger, A. Fellingner, O. Scheiner, A. Gessl, O. Förster,  
259 Differentiation of rat bone marrow cells into macrophages under the influence of mouse L929 cell  
260 supernatant. *J. Leukoc. Biol.* **41**, 83–91 (1987).
- 261 8. R. R. Razonable, M. Henault, L. N. Lee, C. Laethem, P. A. Johnston, H. L. Watson, C. V. Paya, Secretion of  
262 proinflammatory cytokines and chemokines during amphotericin B exposure is mediated by coactivation of  
263 toll-like receptors 1 and 2. *Antimicrob. Agents Chemother.* **49**, 1617–1621 (2005).
- 264 9. D. Weichart, J. Gobom, S. Klopffleisch, R. Häsler, N. Gustavsson, S. Billmann, H. Lehrach, D. Seegert, S.  
265 Schreiber, P. Rosenstiel, Analysis of NOD2-mediated proteome response to muramyl dipeptide in HEK293  
266 cells. *J. Biol. Chem.* **281**, 2380–2389 (2006).
- 267 10. Z. Qin, G. Noffz, M. Mohaupt, T. Blankenstein, Interleukin-10 prevents dendritic cell accumulation and  
268 vaccination with granulocyte-macrophage colony-stimulating factor gene-modified tumor cells. *J. Immunol.*  
269 **159**, 770–776 (1997).
- 270 11. Y. R. Na, D. Jung, G. J. Gu, S. H. Seok, GM-CSF Grown Bone Marrow Derived Cells Are Composed of  
271 Phenotypically Different Dendritic Cells and Macrophages. *Mol. Cells*. **39**, 734–741 (2016).
- 272 12. K. Roney, Bone marrow-derived dendritic cells. *Methods Mol. Biol.* **1031**, 71–76 (2013).
- 273 13. W. Wang, J. Li, K. Wu, B. Azhati, M. Rexiati, Culture and Identification of Mouse Bone Marrow-Derived  
274 Dendritic Cells and Their Capability to Induce T Lymphocyte Proliferation. *Med. Sci. Monit.* **22**, 244–250  
275 (2016).
- 276 14. J. Weischenfeldt, B. Porse, *CSH Protoc*, in press, doi:10.1101/pdb.prot5080.
- 277 15. Y. Ono, M. Nagai, O. Yoshino, K. Koga, A. Nawaz, H. Hatta, H. Nishizono, G. Izumi, A. Nakashima, J.  
278 Imura, K. Tobe, T. Fujii, Y. Osuga, S. Saito, CD11c<sup>+</sup> M1-like macrophages (MΦs) but not CD206<sup>+</sup> M2-  
279 like MΦ are involved in folliculogenesis in mice ovary. *Sci Rep.* **8**, 8171 (2018).

- 280 16. R. Zaynagetdinov, T. P. Sherrill, P. L. Kendall, B. H. Segal, K. P. Weller, R. M. Tighe, T. S. Blackwell,  
281 Identification of myeloid cell subsets in murine lungs using flow cytometry. *Am. J. Respir. Cell Mol. Biol.*  
282 **49**, 180–189 (2013).
- 283 17. A. D. Santin, P. L. Hermonat, A. Ravaggi, M. Chiriva-Internati, M. J. Cannon, J. C. Hiserodt, S. Pecorelli, G.  
284 P. Parham, Expression of surface antigens during the differentiation of human dendritic cells vs  
285 macrophages from blood monocytes in vitro. *Immunobiology*. **200**, 187–204 (1999).
- 286 18. C. Busch, J. Favret, L. Geirsdóttir, K. Molawi, M. Sieweke, Isolation and Long-term Cultivation of Mouse  
287 Alveolar Macrophages. *BIO-PROTOCOL*. **9** (2019), doi:10.21769/BioProtoc.3302.
- 288 19. Y. Shibata, P. Y. Berclaz, Z. C. Chroneos, M. Yoshida, J. A. Whitsett, B. C. Trapnell, GM-CSF regulates  
289 alveolar macrophage differentiation and innate immunity in the lung through PU.1. *Immunity*. **15**, 557–567  
290 (2001).
- 291 20. S. M. Smith, M. B. Wunder, D. A. Norris, Y. G. Shellman, A simple protocol for using a LDH-based  
292 cytotoxicity assay to assess the effects of death and growth inhibition at the same time. *PLoS ONE*. **6**,  
293 e26908 (2011).
- 294 21. E. Carreras, S. Turner, V. Paharkova-Vatchkova, A. Mao, C. Dascher, S. Kovats, Estradiol acts directly on  
295 bone marrow myeloid progenitors to differentially regulate GM-CSF or Flt3 ligand-mediated dendritic cell  
296 differentiation. *J. Immunol.* **180**, 727–738 (2008).
- 297 22. Y. Xu, Y. Zhan, A. M. Lew, S. H. Naik, M. H. Kershaw, Differential development of murine dendritic cells  
298 by GM-CSF versus Flt3 ligand has implications for inflammation and trafficking. *J. Immunol.* **179**, 7577–  
299 7584 (2007).
- 300 23. T. Nikolic, M. F. T. R. de Bruijn, M. B. Lutz, P. J. M. Leenen, Developmental stages of myeloid dendritic  
301 cells in mouse bone marrow. *Int. Immunol.* **15**, 515–524 (2003).
- 302 24. Y. Zhang, A. Harada, J. B. Wang, Y. Y. Zhang, S. Hashimoto, M. Naito, K. Matsushima, Bifurcated dendritic  
303 cell differentiation in vitro from murine lineage phenotype-negative c-kit<sup>+</sup> bone marrow hematopoietic  
304 progenitor cells. *Blood*. **92**, 118–128 (1998).
- 305 25. Y. Dong, A. A. Arif, G. F. T. Poon, B. Hardman, M. Dosanjh, P. Johnson, Generation and Identification of  
306 GM-CSF Derived Alveolar-like Macrophages and Dendritic Cells From Mouse Bone Marrow. *J Vis Exp*  
307 (2016), doi:10.3791/54194.
- 308 26. T. ten Broeke, R. Wubbolts, W. Stoorvogel, MHC class II antigen presentation by dendritic cells regulated  
309 through endosomal sorting. *Cold Spring Harb Perspect Biol.* **5**, a016873 (2013).
- 310 27. Z. Erlich, I. Shlomovitz, L. Edry-Botzer, H. Cohen, D. Frank, H. Wang, A. M. Lew, K. E. Lawlor, Y. Zhan, J.  
311 E. Vince, M. Gerlic, Macrophages, rather than DCs, are responsible for inflammasome activity in the GM-  
312 CSF BMDC model. *Nat. Immunol.* **20**, 397–406 (2019).

313

314

315

316 ***Figure Legends:***

317 **Figure 1: Generation of mouse GM-CSF secreting HEK293T cell line.** (A) Schematic of lentiviral plasmid  
318 construct used to generate the stable HEK293T mGM-CSF expressing cell line. (B) Uninfected, Control plasmid  
319 and mGM-CSF plasmid lentivirally infected HEK293T cells were puromycin selected for mCherry expression and  
320 assessed using flow cytometry. (C) Protein secretion and cell-line stability of mGM-CSF HEK293T cells was  
321 confirmed ELISA, using initial and stock cell-line. Error bars represent the standard deviation of biological  
322 triplicates. Student's t-tests were performed using GraphPad Prism. (SN) indicates not significantly different.

323 **Figure 2: Generation of primary Dendritic Cells using purified GM-CSF or supernatant GM-CSF.** (A)  
324 Schematic of differentiation of primary bone marrow-derived macrophages (BMMs) or primary bone marrow-  
325 derived dendritic cells (BMDCs). (B) Images of primary BMMs and BMDCs under a light microscope after 7 days  
326 of differentiation. (C) Total number of live cells generated from using one of 5 conditions: M-CSF, purified GM-  
327 CSF (pGM-CSF) at 10ng/ml, pGM-CSF at 25ng/ml, supernatant GM-CSF (supGM-CSF) at 10ng/ml or supGM-  
328 CSF at 25ng/ml. (D) Gating of CD45<sup>+</sup> and CD11b<sup>+</sup> M-CSF differentiated cells are represented in a quadrant  
329 contour plot to determine the expression of F4/80 and CD11c. Same gating strategy is used for (E) pGM-CSF at  
330 10ng/ml, (F) pGM-CSF at 25ng/ml, (G) supGM-CSF at 10ng/ml and (H) supGM-CSF at 25ng/ml. (I) Graphical  
331 representation for the percentage of M-CSF or GM-CSF differentiated cells that are F4/80<sup>+</sup> and CD11c<sup>+</sup> (Q2). (J)  
332 Graphical representation for the mean fluorescence of CD11c<sup>+</sup>. (K) Graphical representation for the mean  
333 fluorescence of F4/80<sup>+</sup>. Error bars represent the standard deviation of n=5. Student's t-tests were performed using  
334 GraphPad Prism. Asterisks indicate statistically significant differences between mouse lines (\*p ≥ 0.05, \*\*p ≥ 0.01,  
335 \*\*\*p ≥ 0.005).

336 **Figure 3: Dendritic Cells differentiated with supGM-CSF retain Dendritic Cell activity and are more**  
337 **inflammatory in comparison to pGM-CSF.** (A) Histogram overlay of CD45<sup>+</sup> and CD11b<sup>+</sup> M-CSF (grey) and  
338 pGM-CSF (pink) or (B) supGM-CSF (orange) differentiated cells expressing MHC II. (C) Graphical representation  
339 of MHC II mean fluorescence intensity (MFI) of M-CSF, pGM-CSF, or supGM-CSF differentiated cells. (D) Il6  
340 transcript measure by RTq-PCR from pGM-CSF (pink) or supGM-CSF (orange) DCs stimulated with LPS for 0, 6,  
341 and 24hrs. (E) Dendritic cells differentiated with pGM-CSF (pink) or sup-GM-CSF (orange) were treated with

342 lipofectamine, LPS (24hrs) or LPS (2hrs) and polydA:dT (6hrs) secreted IL-6 or IL-1 $\beta$  (E) was measured by ELISA.  
343 Student's t-tests were performed using GraphPad Prism. Asterisks indicate statistically significant differences  
344 between mouse lines (\* $p \geq 0.05$ , \*\* $p \geq 0.01$ , \*\*\* $p \geq 0.005$ ).

345 **Figure 4: supGM-CSF can differentiate functional Alveolar Macrophages.** (A) Schematic of alveolar  
346 macrophage supGM-CSF harvesting and differentiating experiment. (B) The cellular viability of differentiated  
347 alveolar macrophages was measured by LDH, where media, cells, and lysis of cells were measured. (C) Secreted  
348 IL6 protein was measured from supGM-CSF differentiated alveolar macrophages treated with and without LPS for  
349 6hrs, as well as (D) TNFa, (E) MDC, (F) MCP-1, (G) IP10, (H) KC and (I) Rantes. Student's t-tests were performed  
350 using GraphPad Prism. Asterisks indicate statistically significant differences between mouse lines (\* $p \geq 0.05$ , \*\* $p$   
351  $\geq 0.01$ , \*\*\* $p \geq 0.005$ ).

352 **Supplemental Figure 1: Validation of cloned murine GM-CSF.** (A) Image of PspXI and NotI digested PCR  
353 product of murine GM-CSF. (B) Detailed 266 vector map of mGM-CSF, restriction sites, promoter, antibiotic  
354 selection and mCherry sequence. (C) Alignment of Sanger sequencing results of mGM-CSF and 266 Vector map  
355 strategy. (D) Quality of sanger sequencing results of murine GM-CSF.

356 **Supplemental Figure 2: mCherry expression in HEK293T cell line.** HEK-293T cell line lentiviral integration of  
357 GM-CSF was selected using puromycin (2ug/ml) over a week. Flow cytometry was used to assess fluorescence  
358 intensity.

359 **Supplemental Figure 3: Gating strategy for identifying dendritic cell and macrophage populations.** M-CSF  
360 and GM-CSF differentiated cells were both put through the same gating strategy. The 5 gating plots are for the (A)  
361 M-CSF, (B) pGM-CSF (10ng/ml), (C) pGM-CSF (25ng/ml), (D) supGM-CSF (10ng/ml), (E) supGM-CSF  
362 (25ng/ml) differentiated cells. Non-debris cells were gated for in gate 1, then singlets in gate 2, followed by CD45+  
363 and live cells were gated for in gate 3, then CD11b+ cells were gated in gate 4 finally this population of cells were  
364 visualized using F4/80+ and CD11c+ markers and gate were put into quadrants.

365 **Supplemental Figure 4: Expression of MHC II on dendritic cell populations differentiated with 10ng/ml**  
366 **pGM-CSF or supGM-CSF.** (A) Histogram overlay of CD45+ and CD11b+ M-CSF (grey) and pGM-CSF (pink)  
367 or (B) supGM-CSF (orange) differentiated cells expressing MHC II. (C) Graphical representation of MHC II mean

368 fluorescence of M-CSF, pGM-CSF, or supGM-CSF differentiated cells. Student's t-tests were performed using  
369 GraphPad Prism. Asterisks indicate statistically significant differences between mouse lines (\* $p \geq 0.05$ , \*\* $p \geq 0.01$ ,  
370 \*\*\* $p \geq 0.005$ ).  
371

372 ***Extended Methods***

373 Comprehensive Methods in the Creation of an mGM-CSF-Producing HEK293T Cell Line, Collection of mGM-  
374 CSF-rich Supernatant, and Using Cell Line Supernatant to Generate Dendritic Cells From Myeloid Progenitors

375 ***Creating Cell Line***

- 376 1. Acquire mGM-CSF gene (Addgene: Plasmid #74465)
  - 377 a. Sequence to check for correct composition
- 378 2. PCR mGM-CSF gene
  - 379 a. Create and acquire primers with required restriction sites (NotI-HF and PspXI)
  - 380 b. PCR
- 381 3. Purify/isolate mGM-CSF gene (band size?)
- 382 4. Ligation of mGM-CSF gene with 681 bidirectional vector plasmid
  - 383 a. Restriction digest 681 bidirectional vector with Not1-HF and PspXI and purify
  - 384 b. Restriction digest modified mGM-CSF gene with Not1-HF and PspXI and purify
  - 385 c. Ligate vector with gene
- 386 5. Transform E. coli. with 681 + GM-CSF plasmid construct
- 387 6. Extract and isolate 681 + GM-CSF plasmid construct
  - 388 a. Incubate E. coli in liquid LB
  - 389 b. Miniprep
  - 390 c. Colony PCR and run through the gel to determine sample with GM-CSF gene inserted in 681  
391 vector
- 392 7. Create lentiviral constructs containing plasmid
- 393 8. Infect HEK293 cells using lentiviral constructs
- 394 9. Select for cells with 681 + GM-CSF plasmid construct
  - 395 a. Allow cells to recuperate from infection and grow to confluence
  - 396 b. Puro-select
  - 397 c. FACS to determine concentration of mCherry+ cells (>90% required)



398 ***Collecting mGM-CSF-rich supernatant***

- 399 1. Allow for HEK293 cells with plasmid construct to grow to confluency
- 400 2. (To be redone in T-175) Plate 2 million cells per 10 cm plate
- 401 3. Incubate for 3 days
- 402 4. Collect supernatant
- 403 5. If needed to confirm the concentration of mGM-CSF in the supernatant, perform ELISA (~200 ng/ml)

404 ***\*In a T-175 flask***

- 405 1. Allow for HEK293 cells with plasmid construct to grow to confluency
- 406 2. Plate 9 million cells in 50 ml DMEM per T-175 flask
- 407 3. Incubate for 3 days
- 408 4. Collect supernatant
- 409 5. If needed to confirm the concentration of mGM-CSF in the supernatant, perform ELISA (~200 ng/ml)

410 ***Generation of Bone-Marrow-Derived DCs***

411 *Day 0*

- 412 1. Sacrifice one or two mice and reserve femur and tibia of mice
- 413 2. Extract bone marrow cells from femur and tibia
- 414 3. In 6 well plate, plate equal amounts of cells into each well
- 415 a. Total media should be equal to 2 ml per well (cells + DMEM + cytokine)
- 416 4. Incubate for three days

417 *Day 3*

- 418 5. On third day of differentiation, wash off dead cells
- 419 a. Aspirate media
- 420 b. Perform a rough PBS wash
- 421 c. Aspirate PBS
- 422 d. Replace media

423 *Day 4 (if cells reach confluency)*

- 424 6. On fourth day of differentiation, move cells onto 10 cm plate
- 425 a. Save conditioned media
- 426 b. Perform normal PBS wash?
- 427 c. Aspirate PBS
- 428 d. Using cell scraper, gently scrape cells off plate
- 429 e. Transfer cells onto 10 cm plate
- 430 f. Replace media
- 431 i. Total media should be 10 ml (cells + DMEM + cytokine)
- 432 7. Incubate for 2-3 days
- 433 *Day 5 or 6*
- 434 8. Replace media
- 435 a. Save conditioned media
- 436 b. Perform normal PBS wash?
- 437 c. Aspirate PBS
- 438 d. Replace media (10 ml total; 6.750 ml DMEM + 2 ml conditioned media + ~1.250 ml supernatant)
- 439 9. Incubate for 1-2 days
- 440 *Day 7 or until usage before day 14*
- 441 10. Replace media every 2-3 days
- 442 11. Cells finished differentiation. Ready for use.

Figure 1.

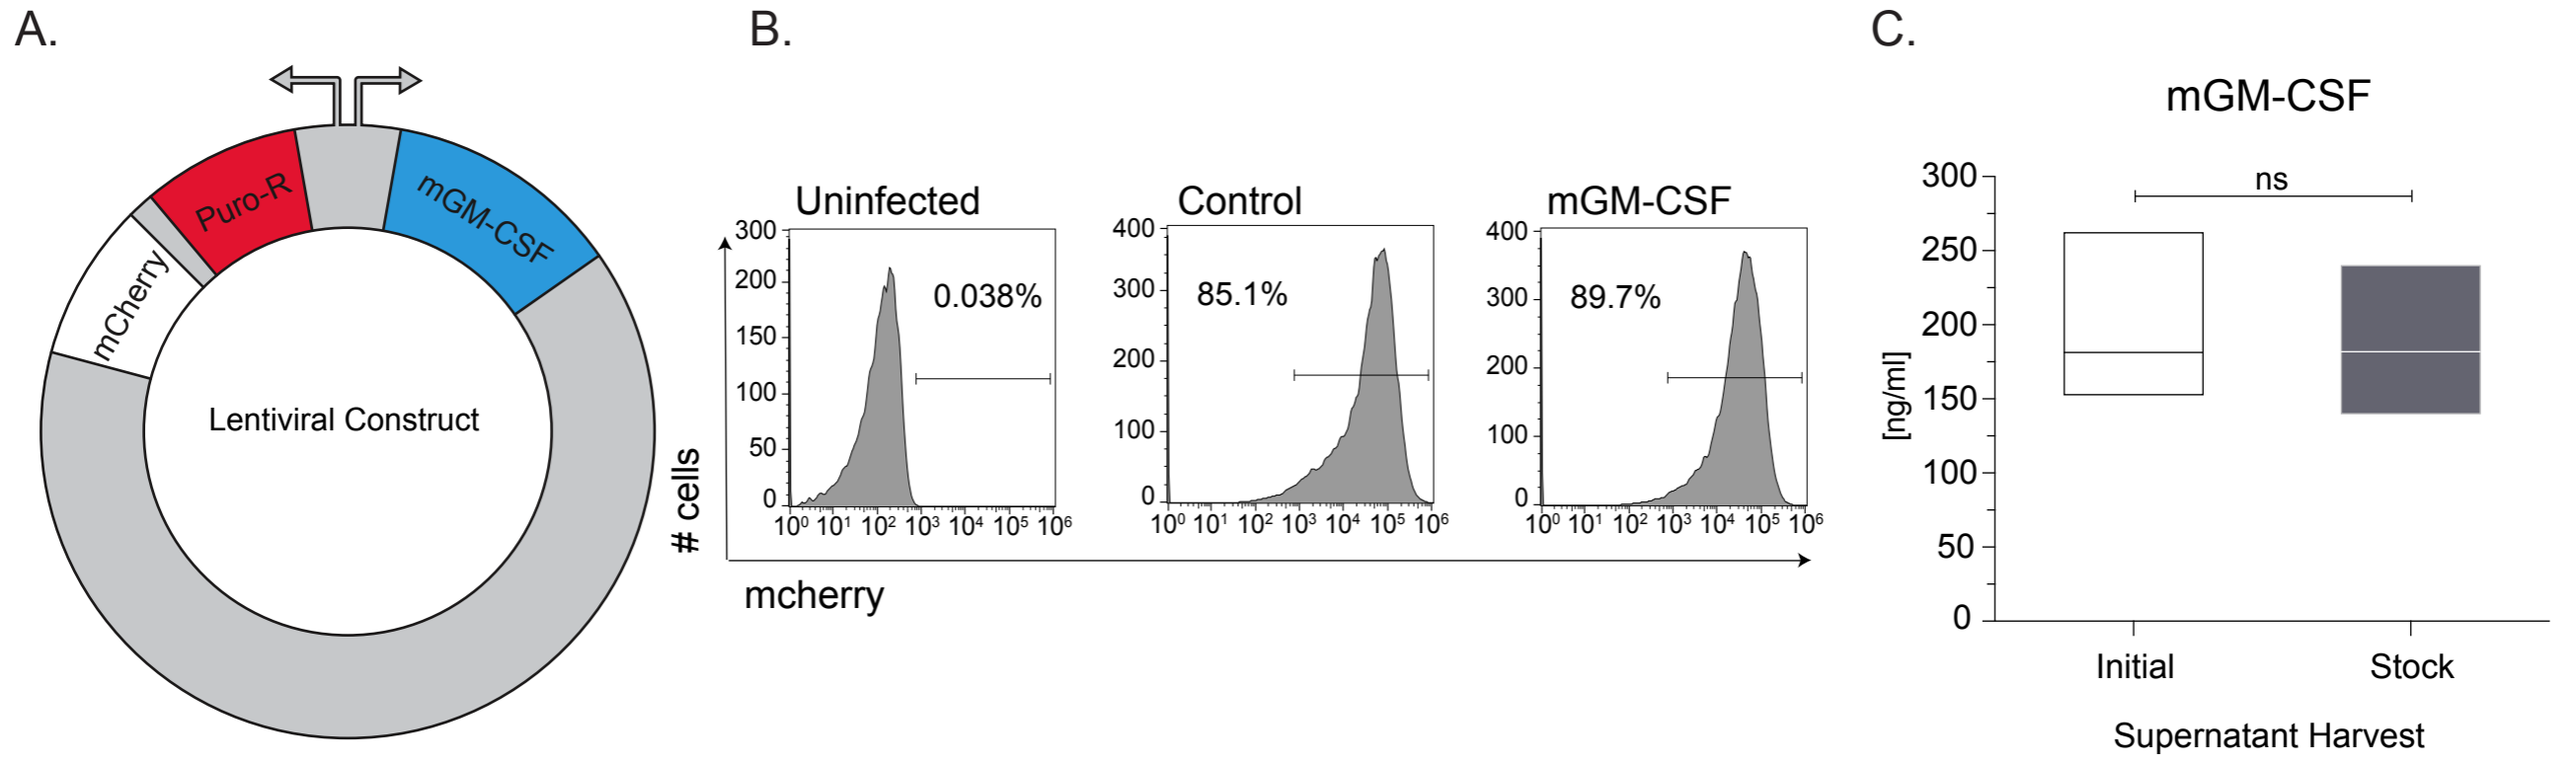

A.

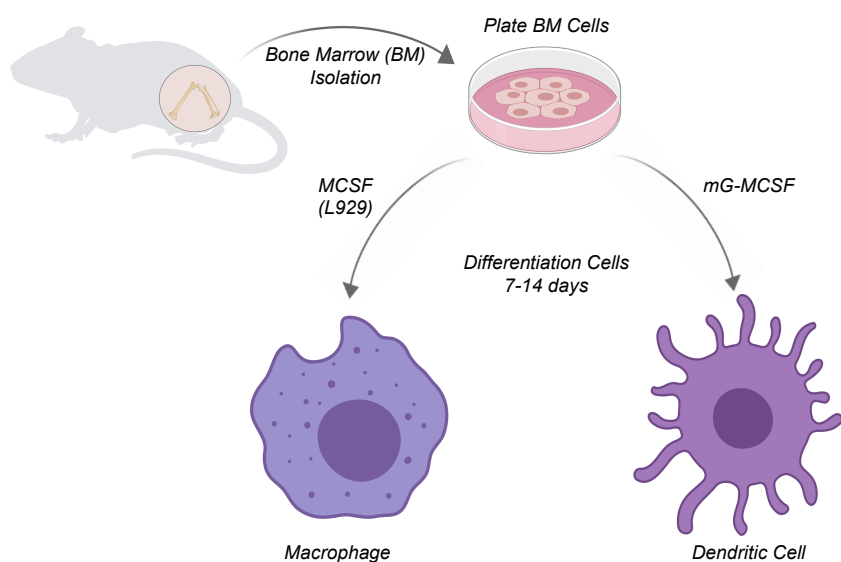

B.

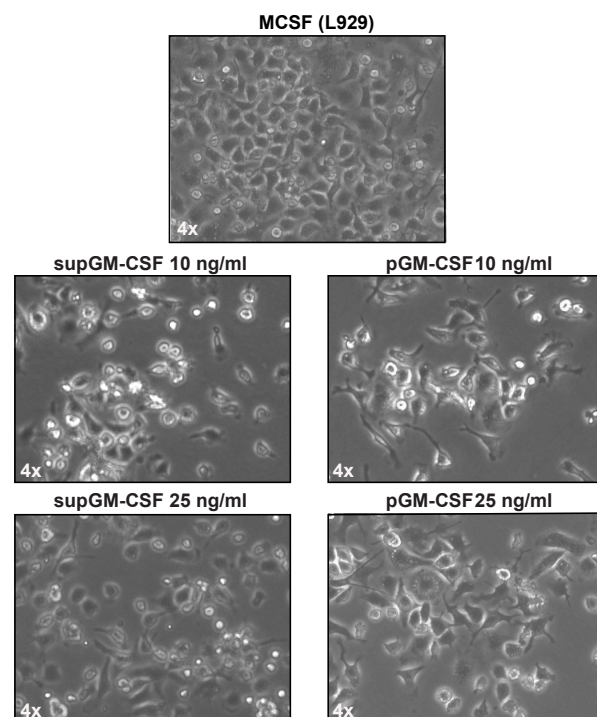

C.

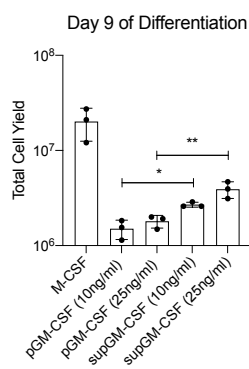

D.

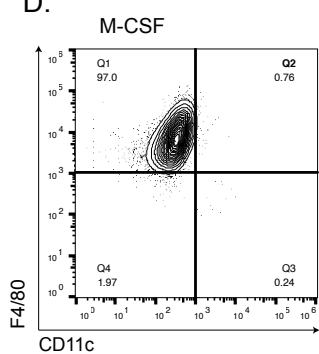

E.

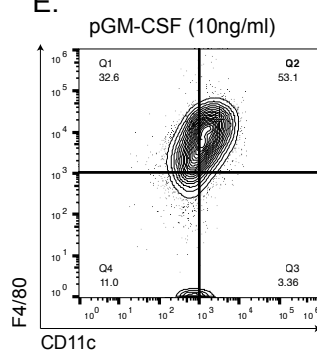

F.

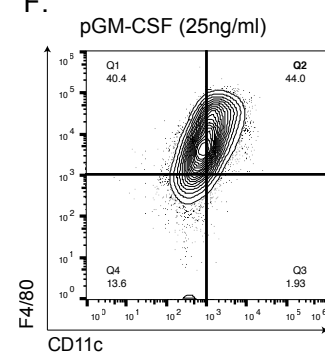

G.

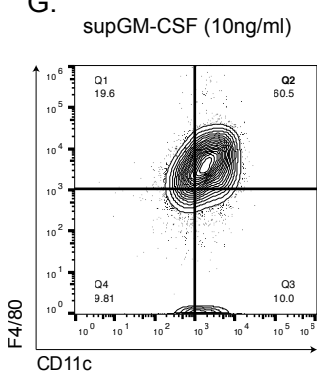

H.

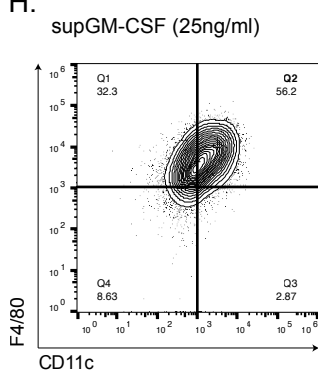

I.

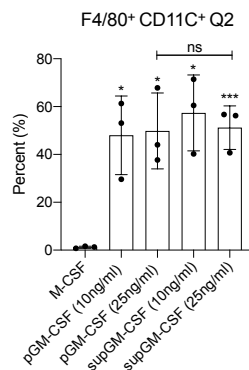

J.

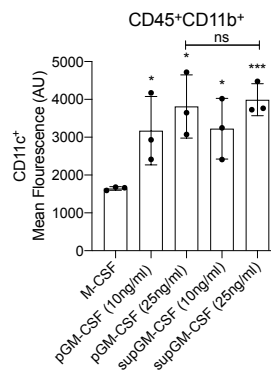

K.

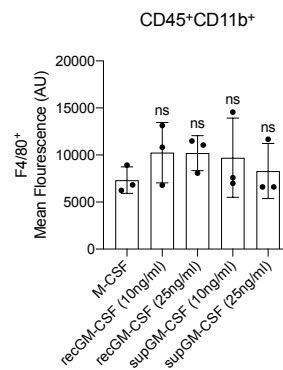

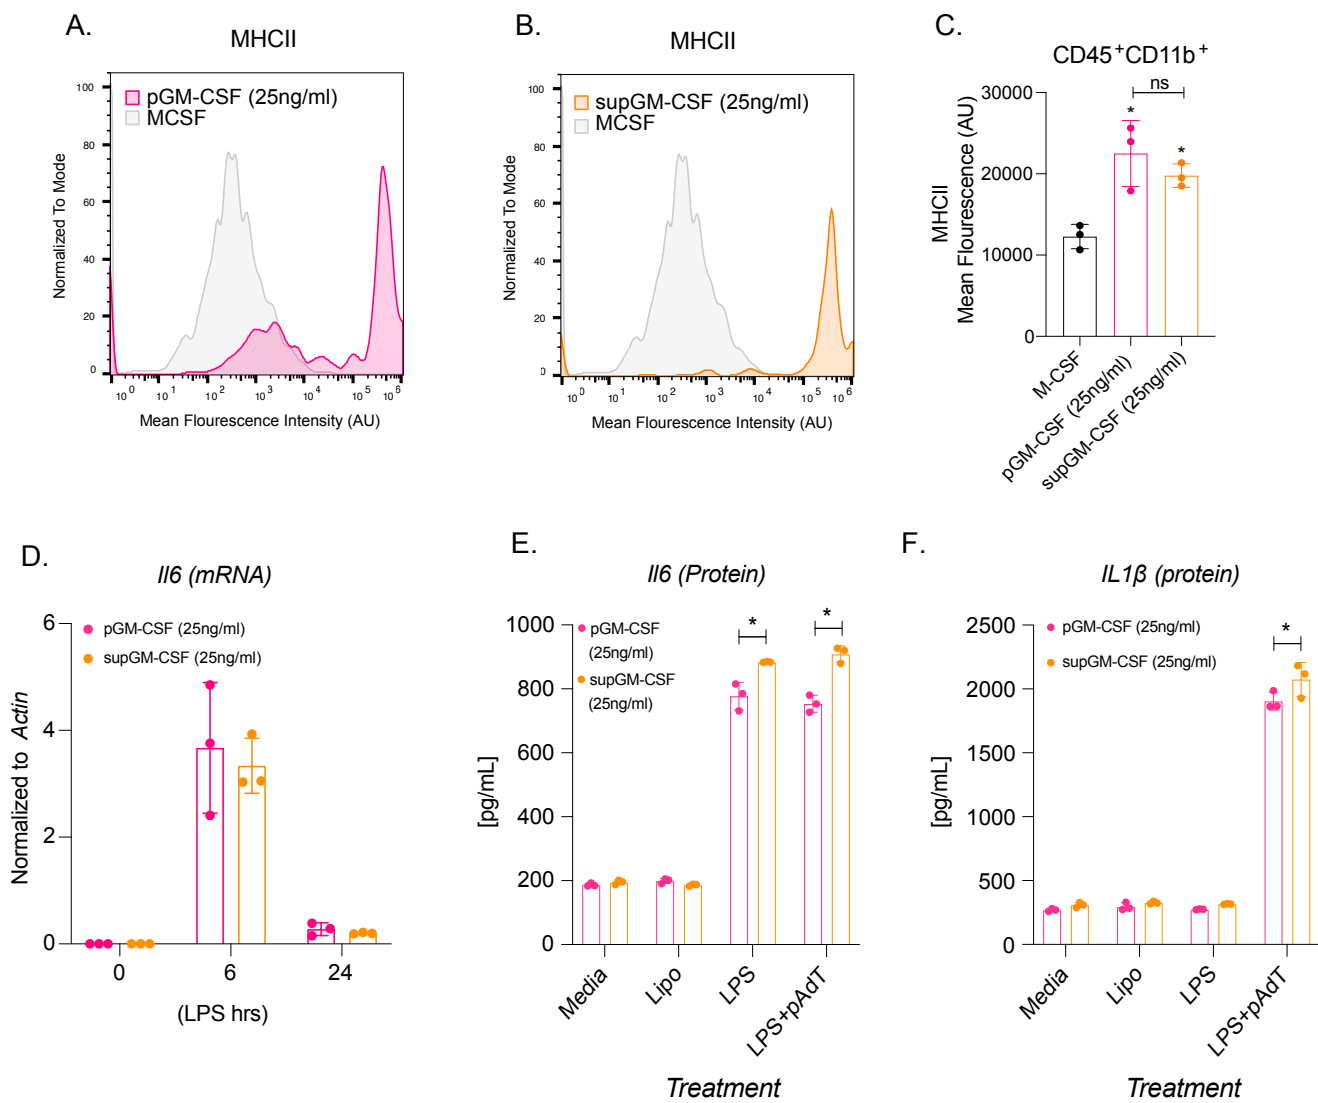

Figure 4

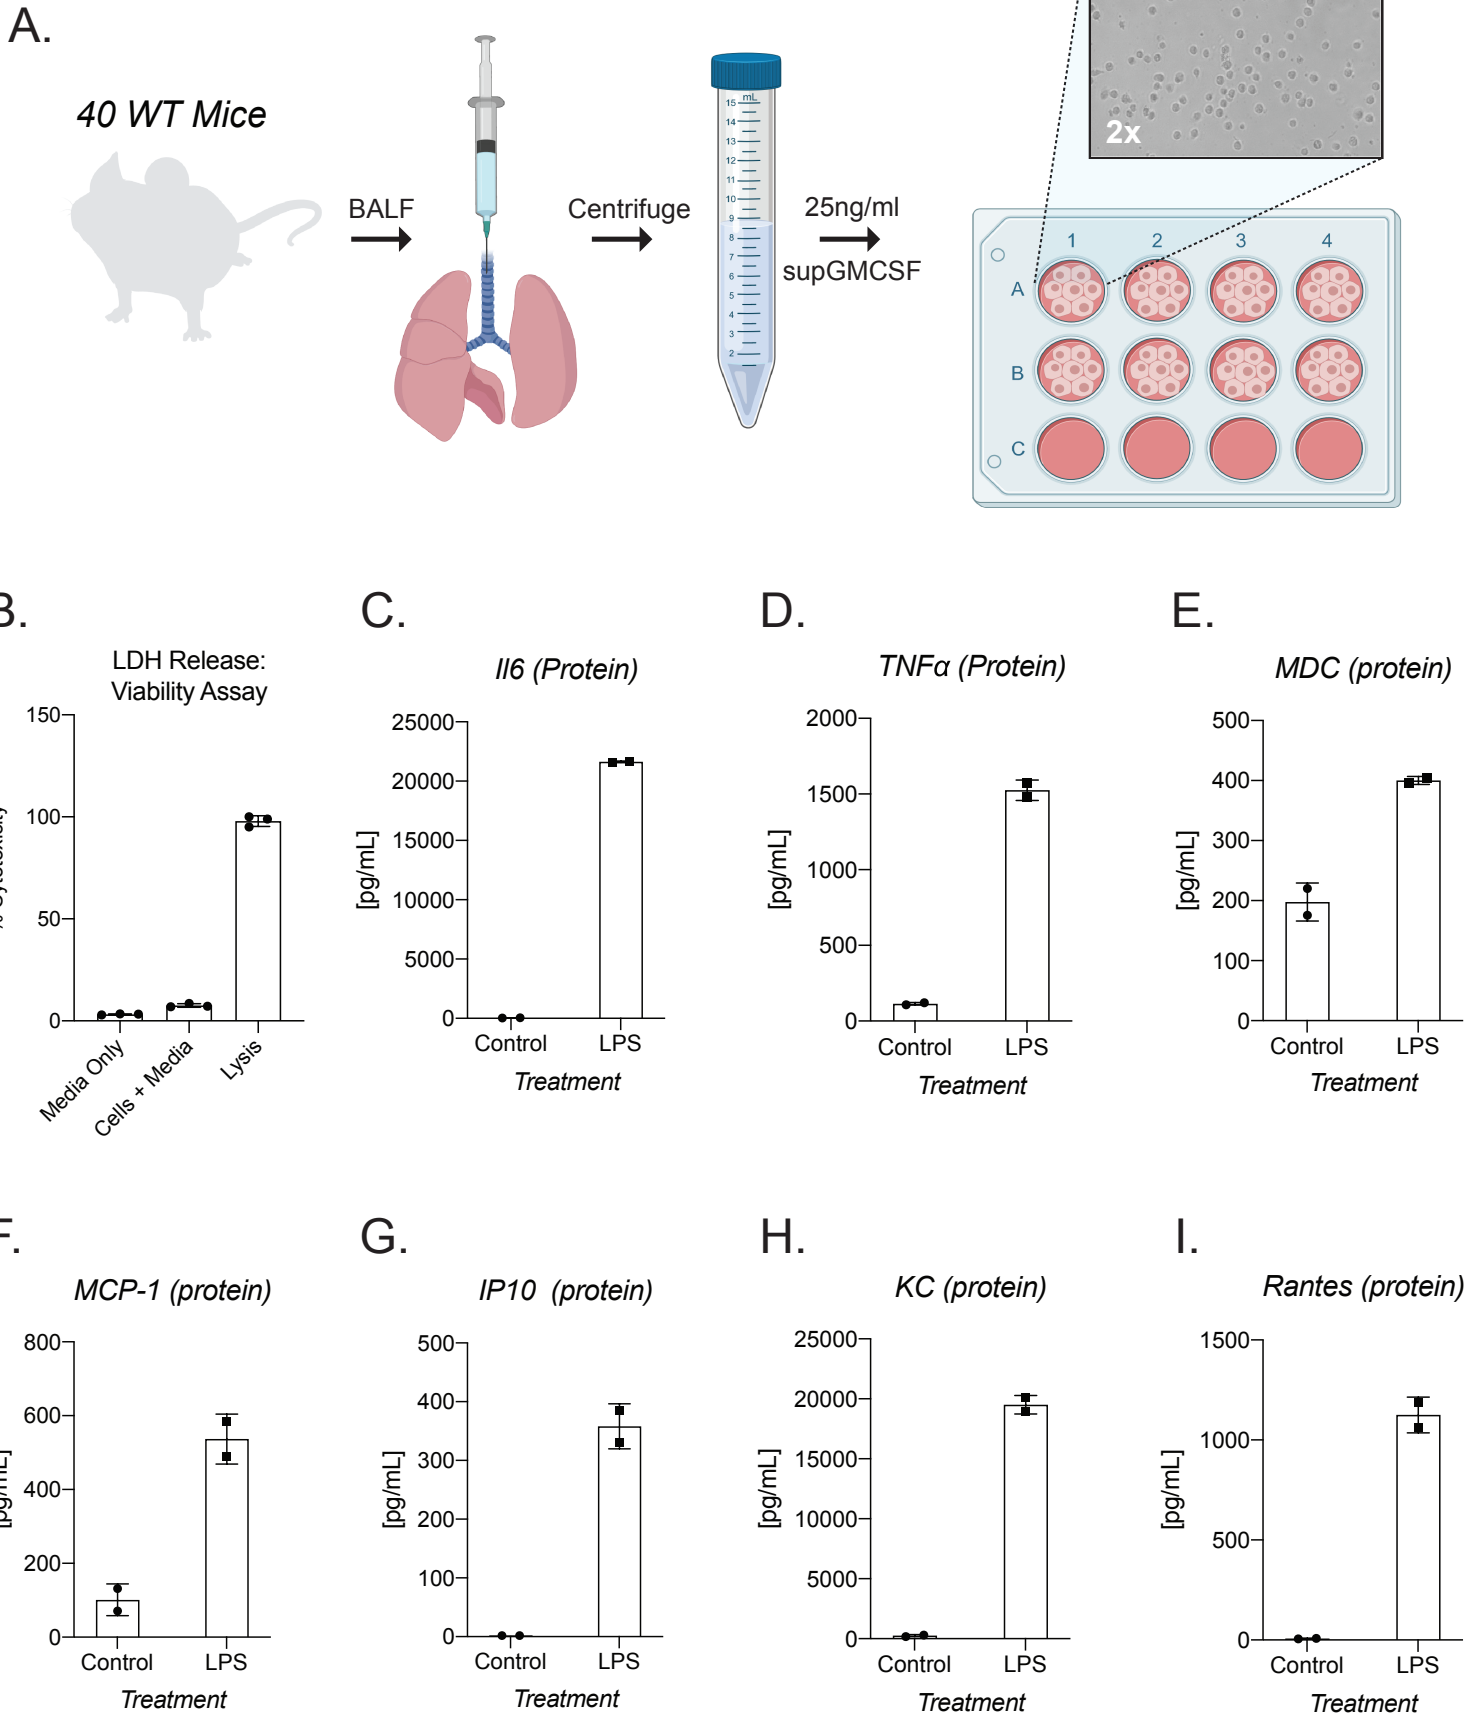

Supplemental Figure 1.

A.

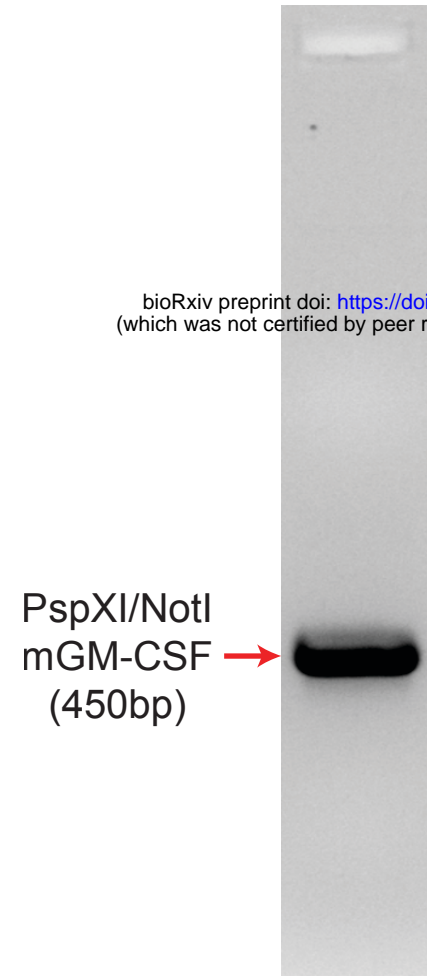

bioRxiv preprint doi: <https://doi.org/10.1101/2020.06.18.167066>; this version posted June 20, 2020. The copyright holder for this preprint (which was not certified by peer review) is the author/funder, who has granted bioRxiv a license to display the preprint in perpetuity. It is made available under aCC-BY-NC-ND 4.0 International license.

B.

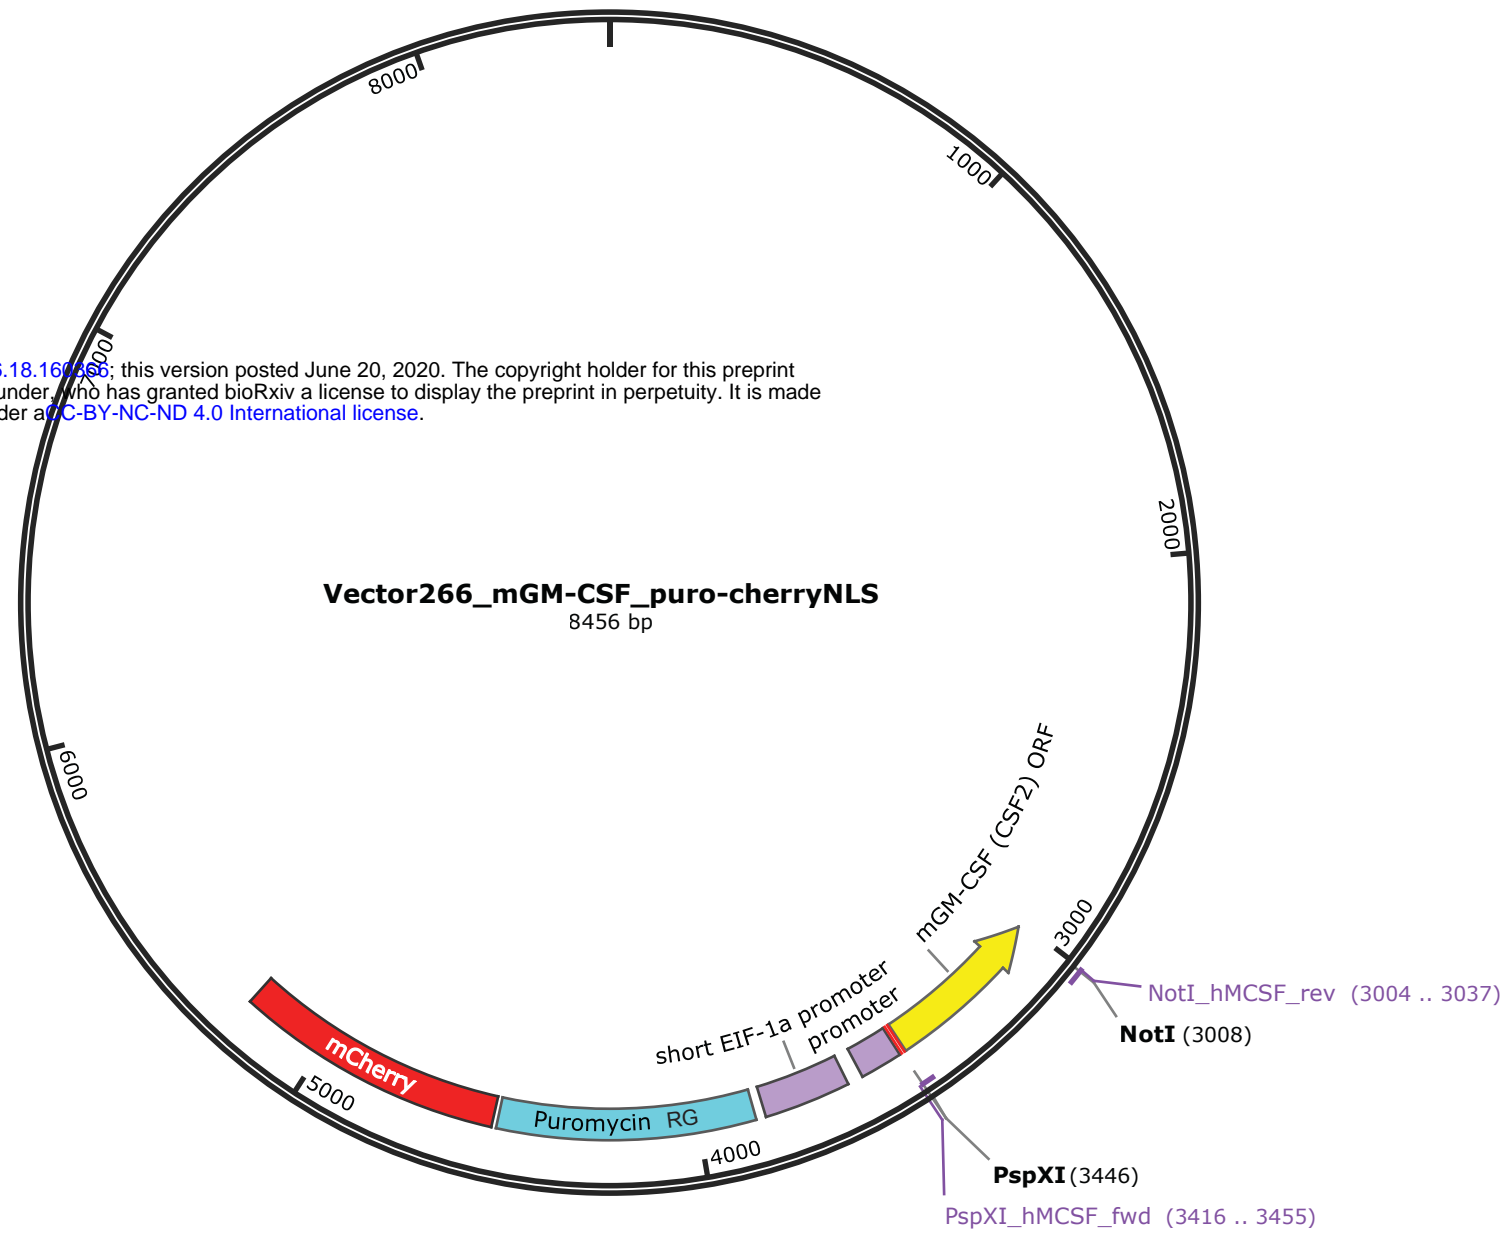

C.

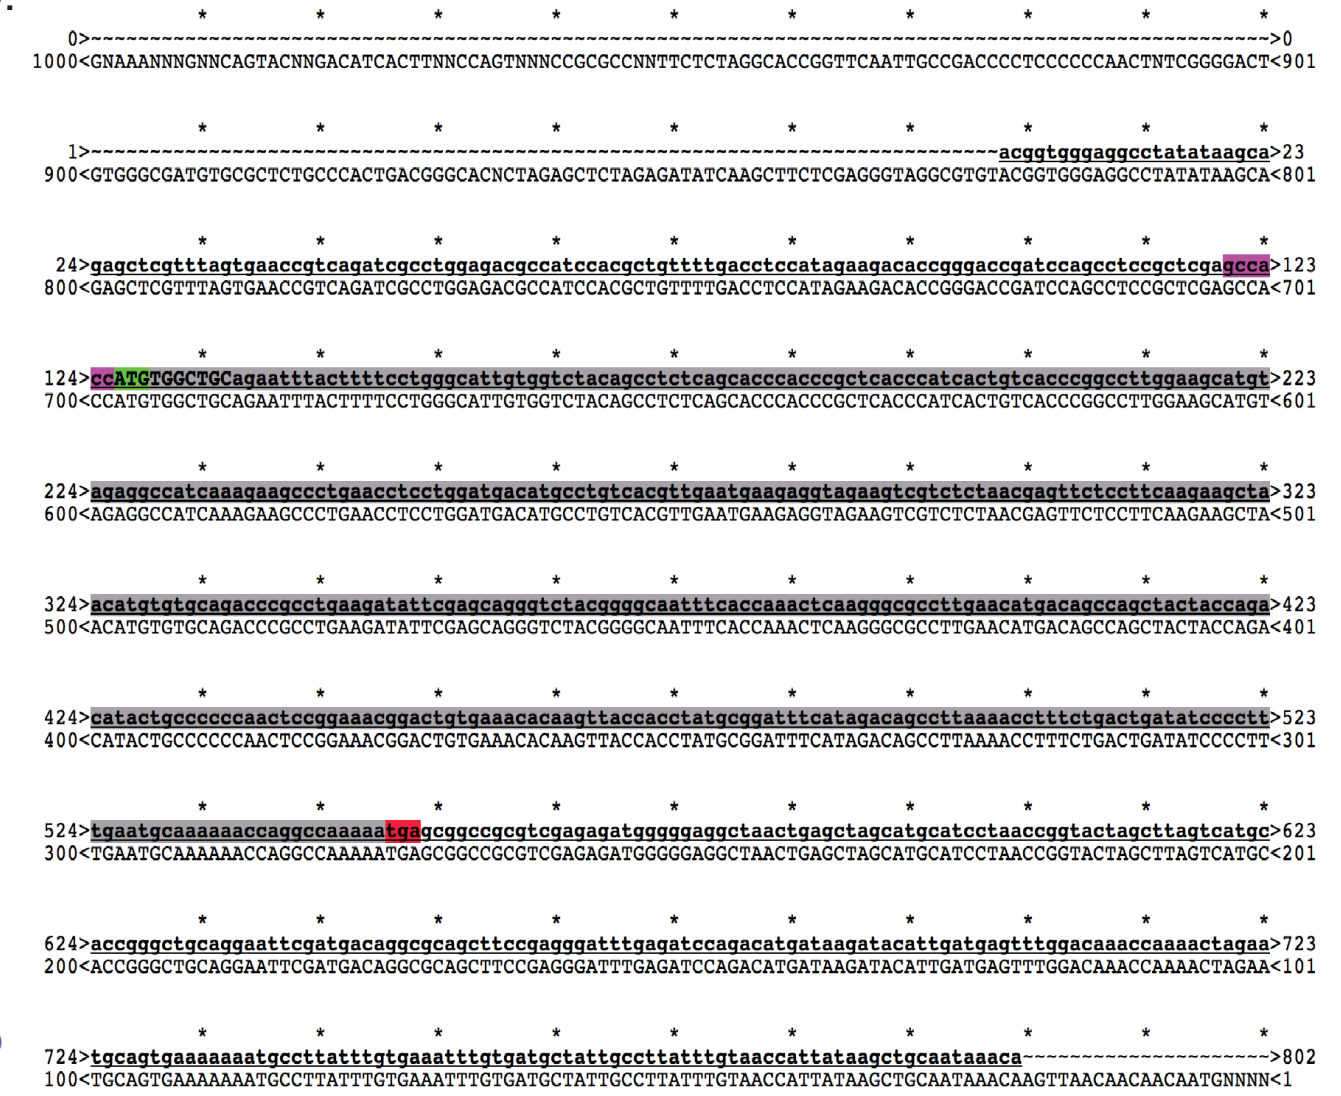

Legend:

- purple = kozak
- green = ATG (start codon)
- red = TGA (stop codon)
- gray = GMCSF

D.

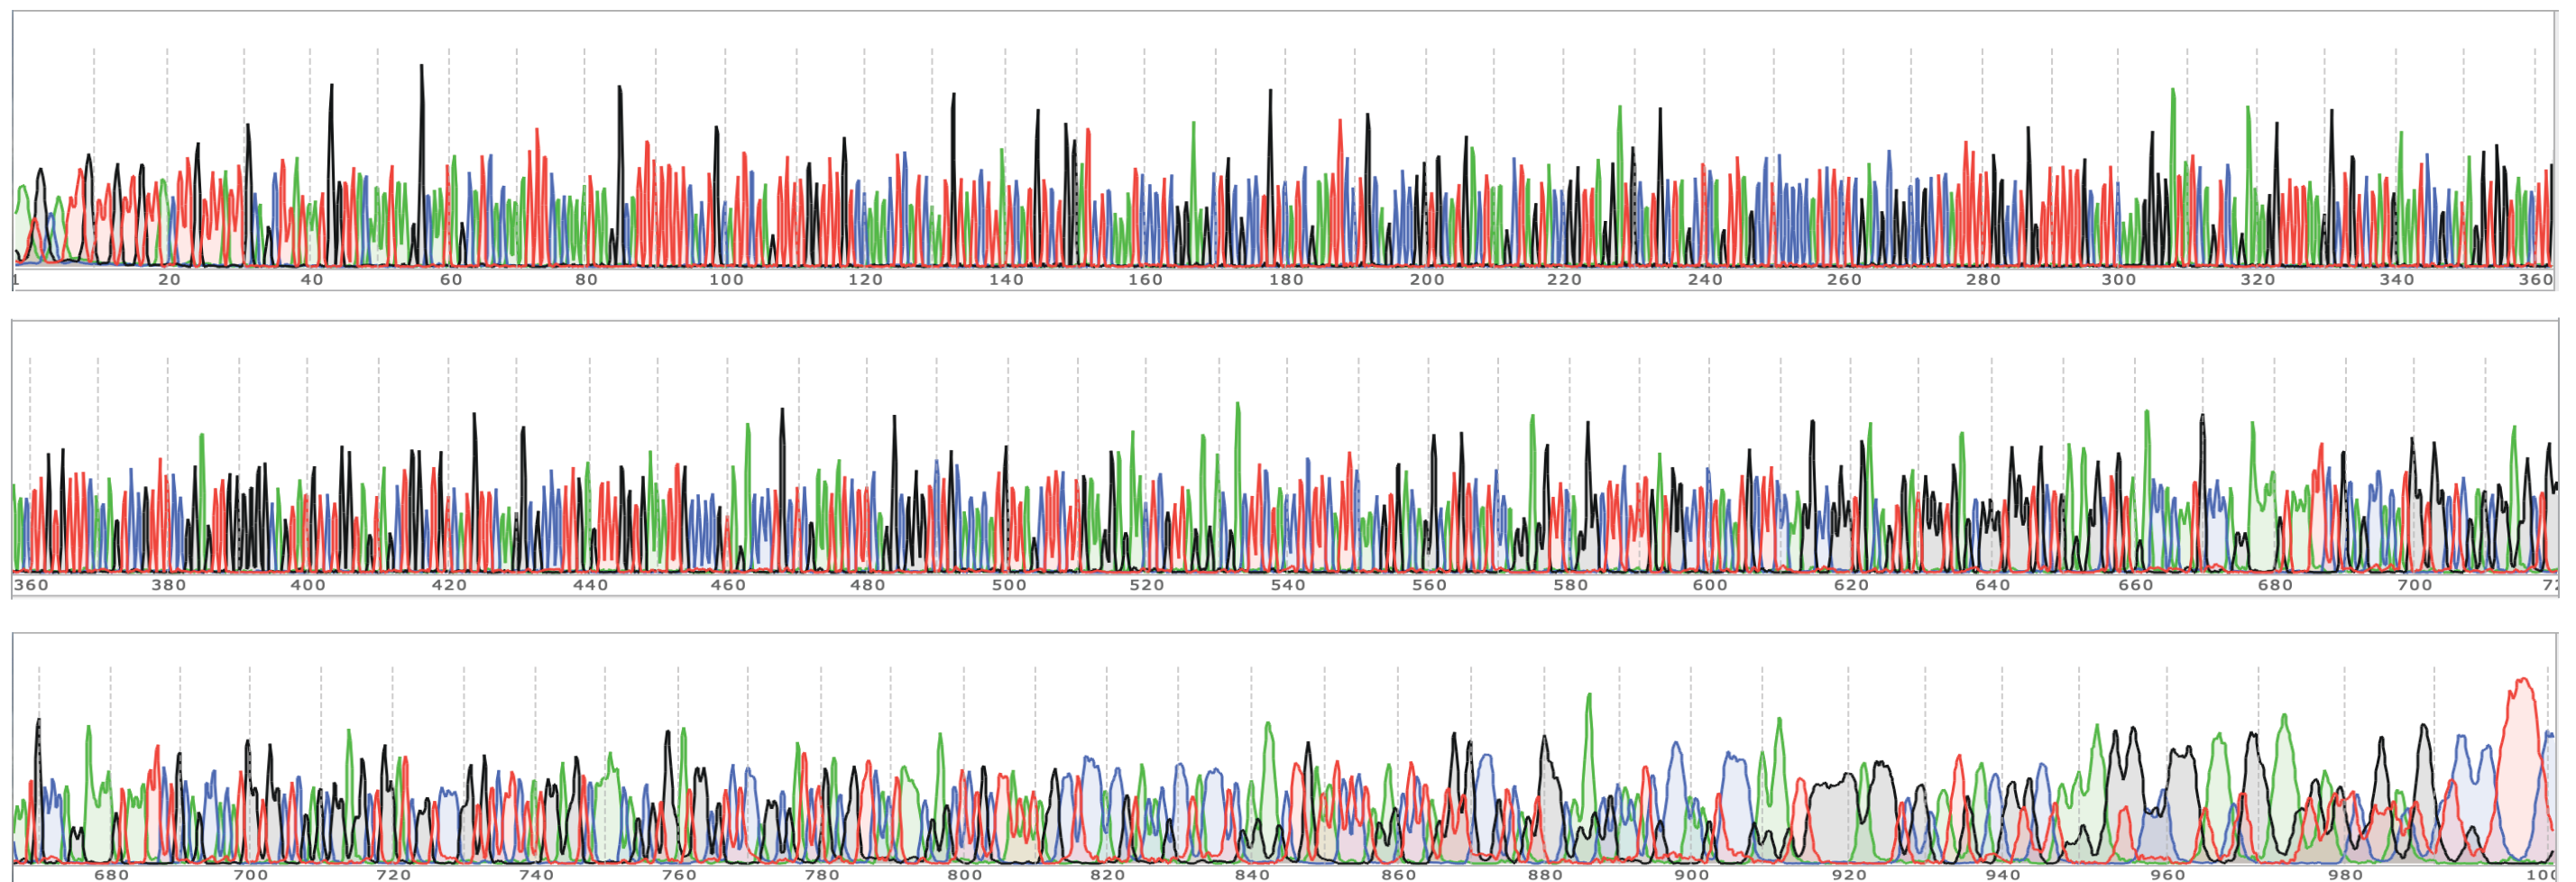

# Supplemental Figure 2

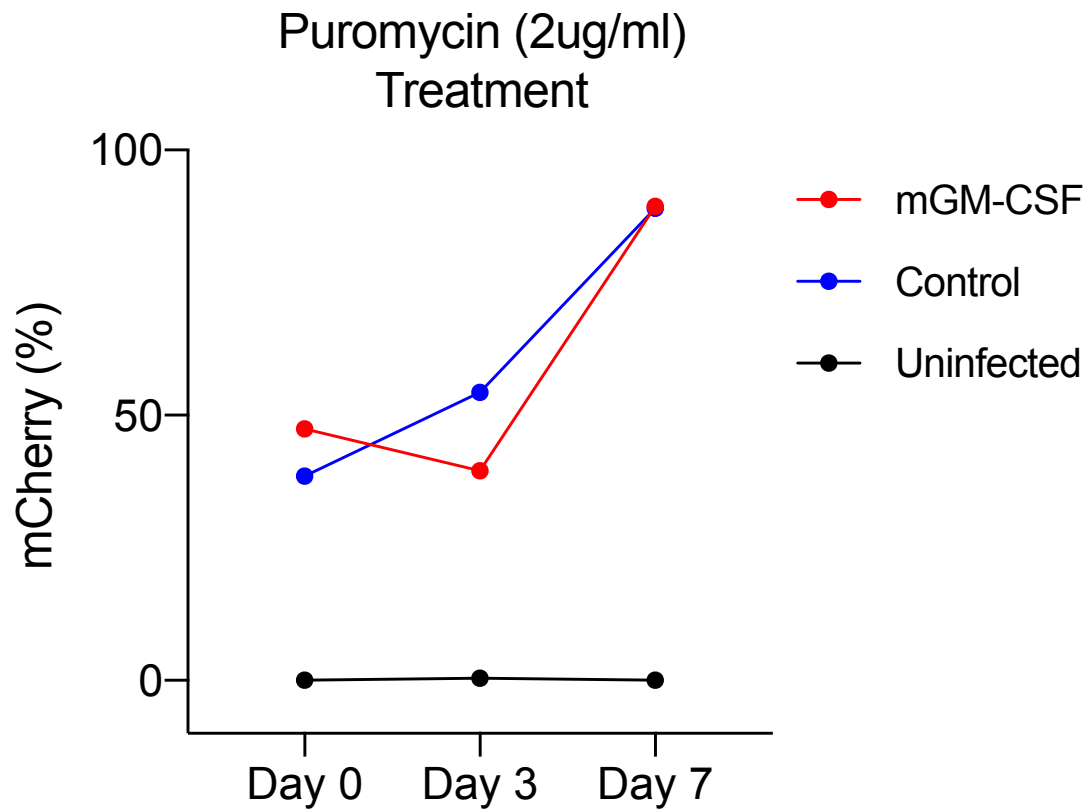



# Supplemental Figure 3

## A. M-CSF

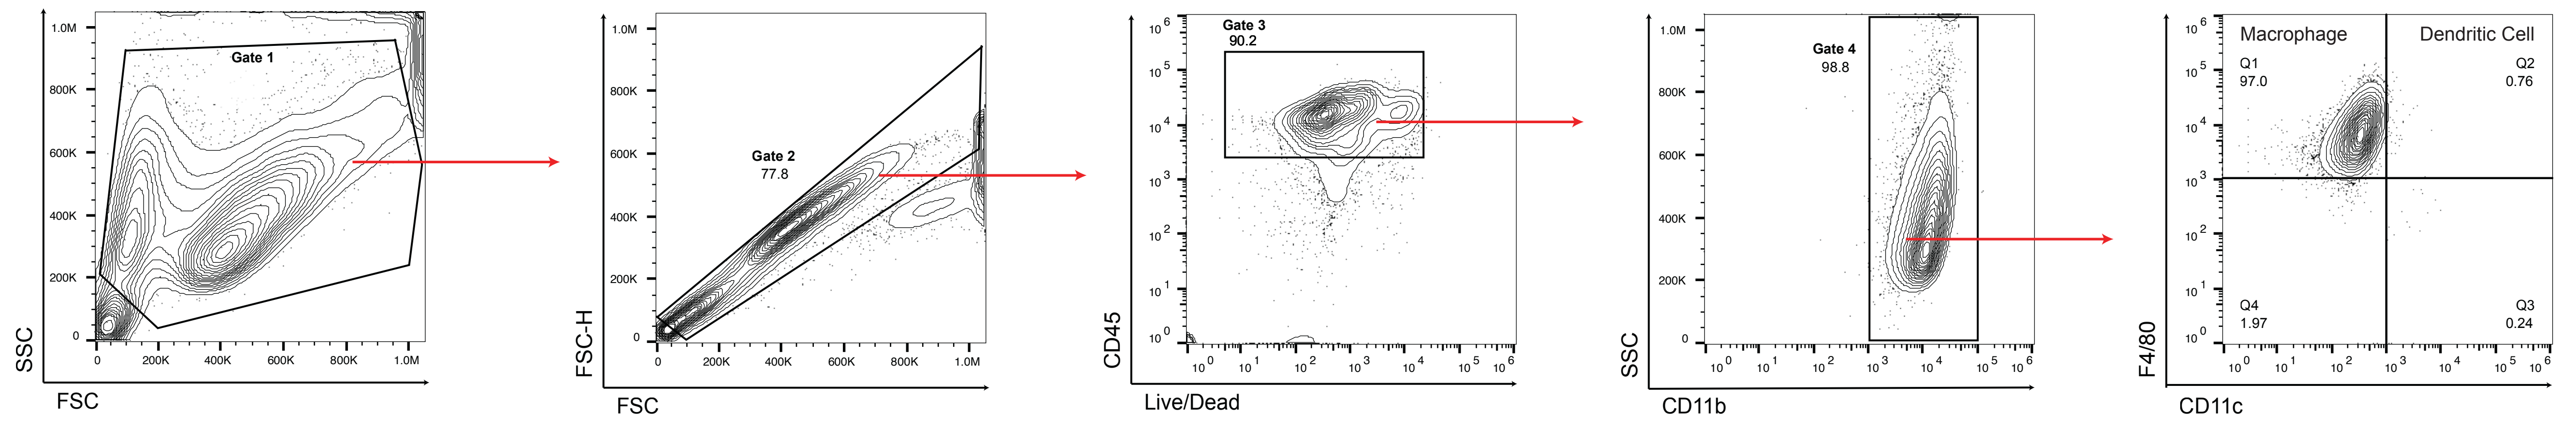

## B. pGM-CSF (10ng/ml)

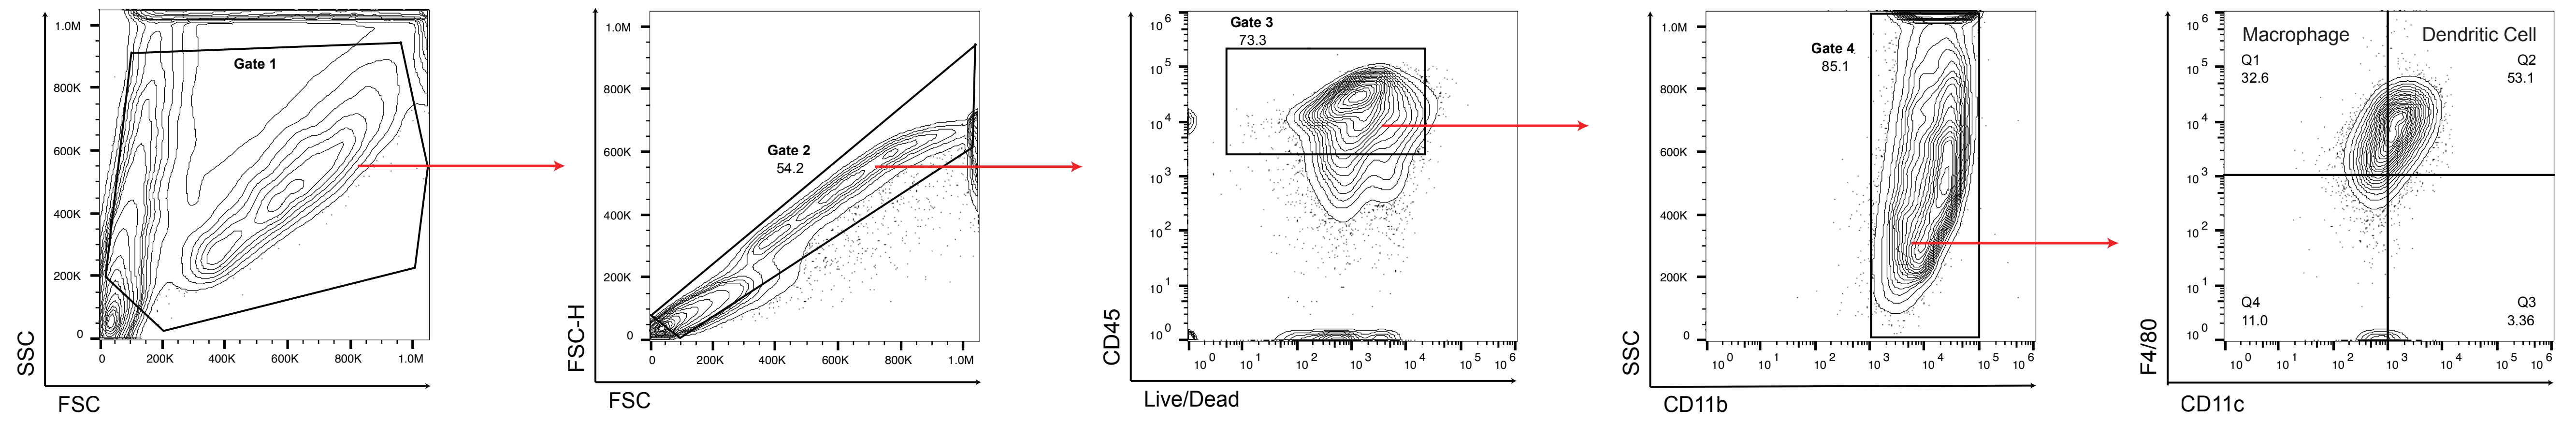

## C. pGM-CSF (25ng/ml)

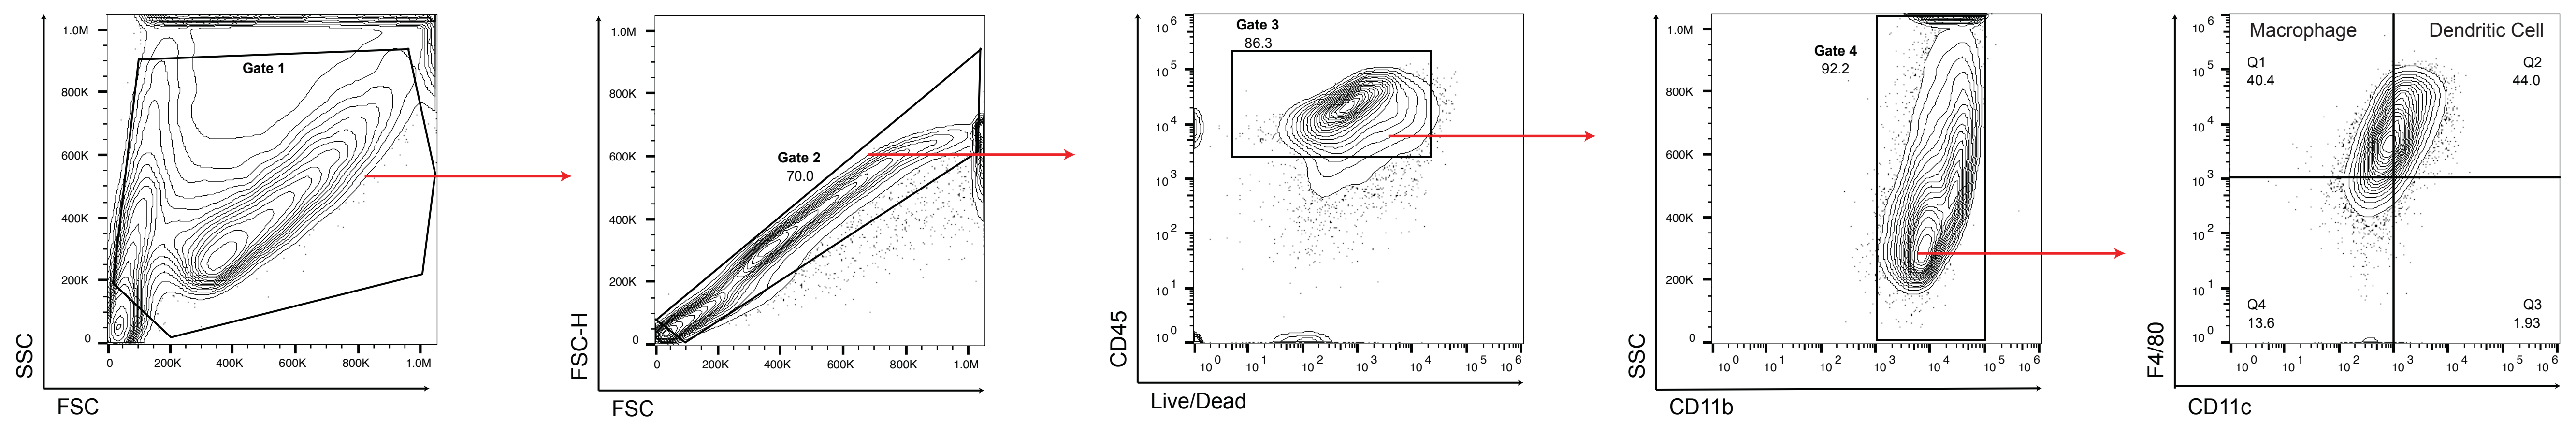

## D. supGM-CSF (10ng/ml)

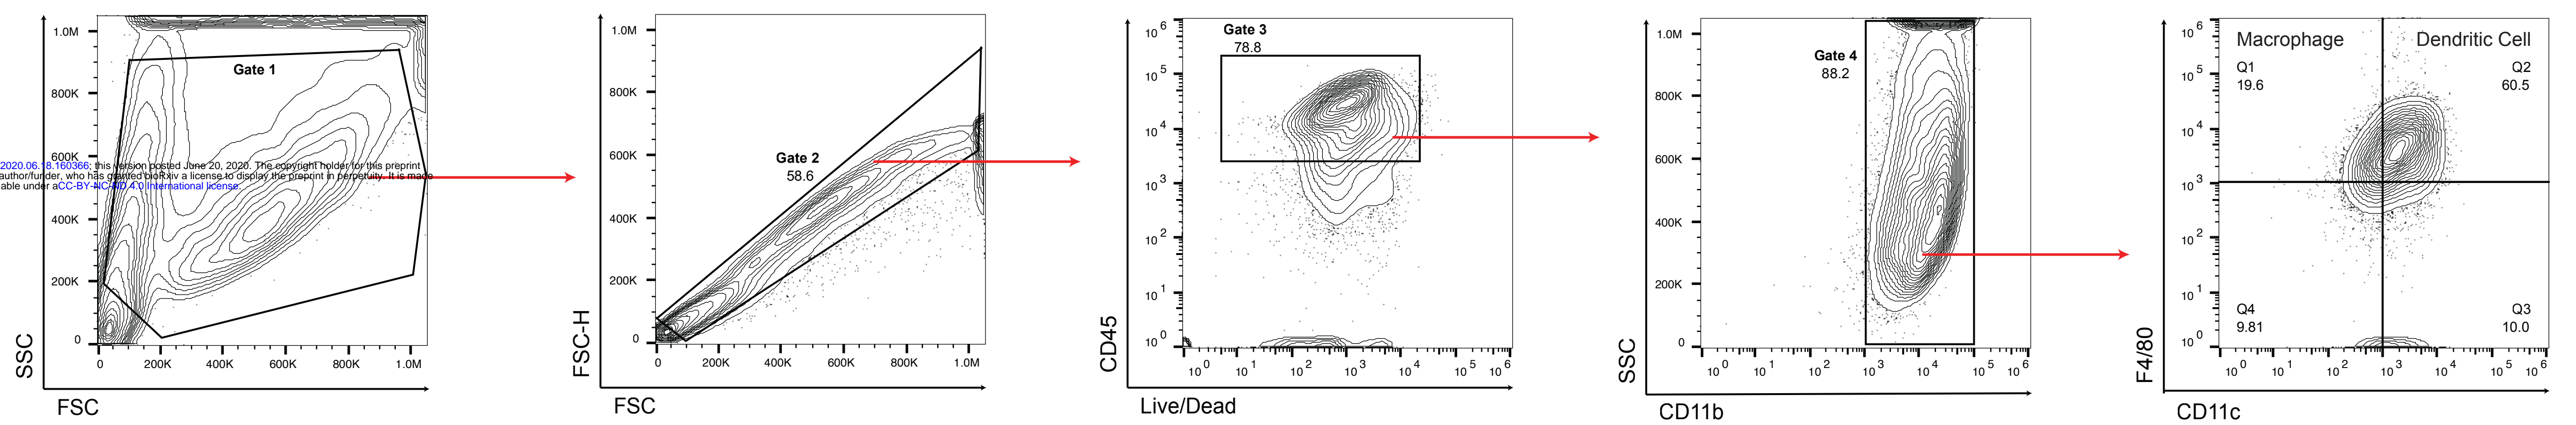

## E. supGM-CSF (25ng/ml)

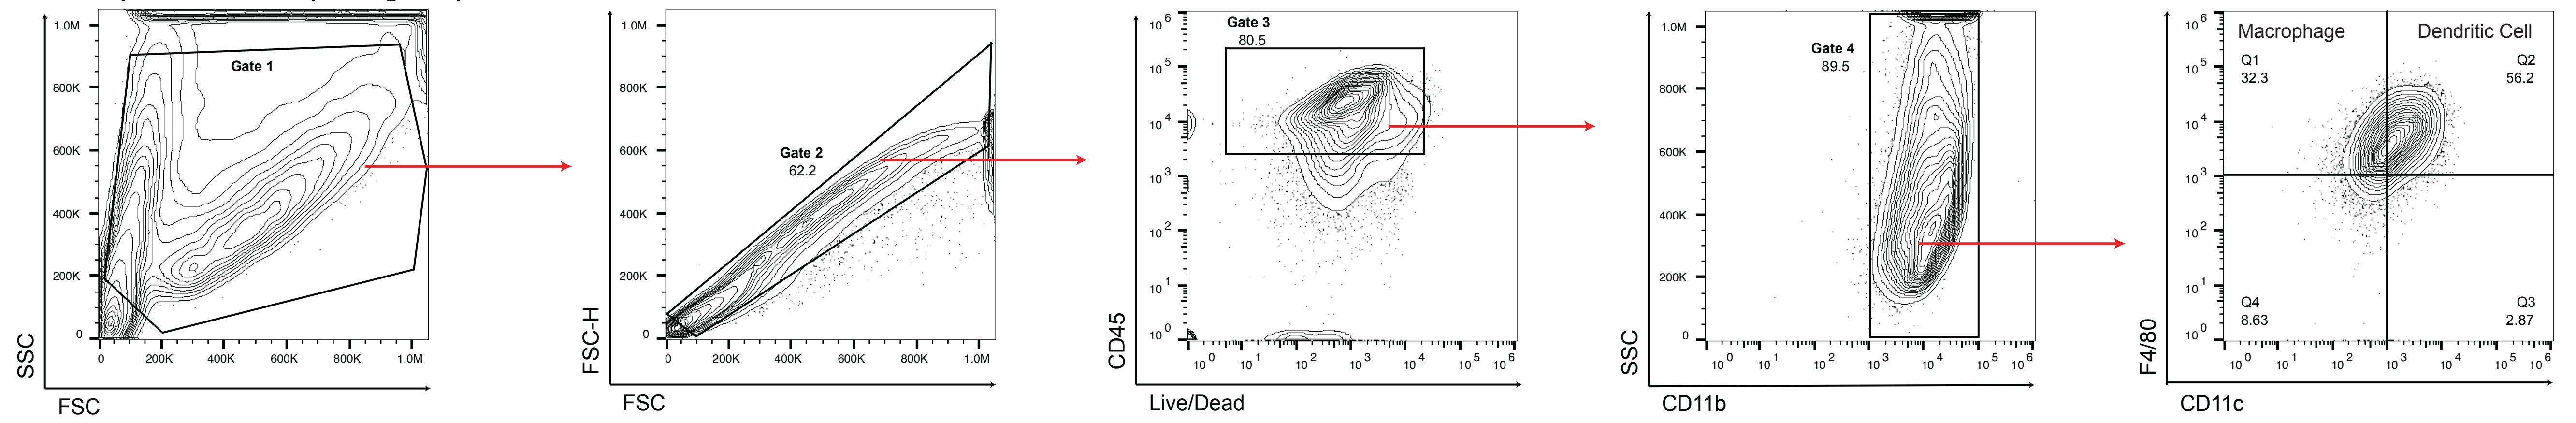

# Supplemental Figure 4

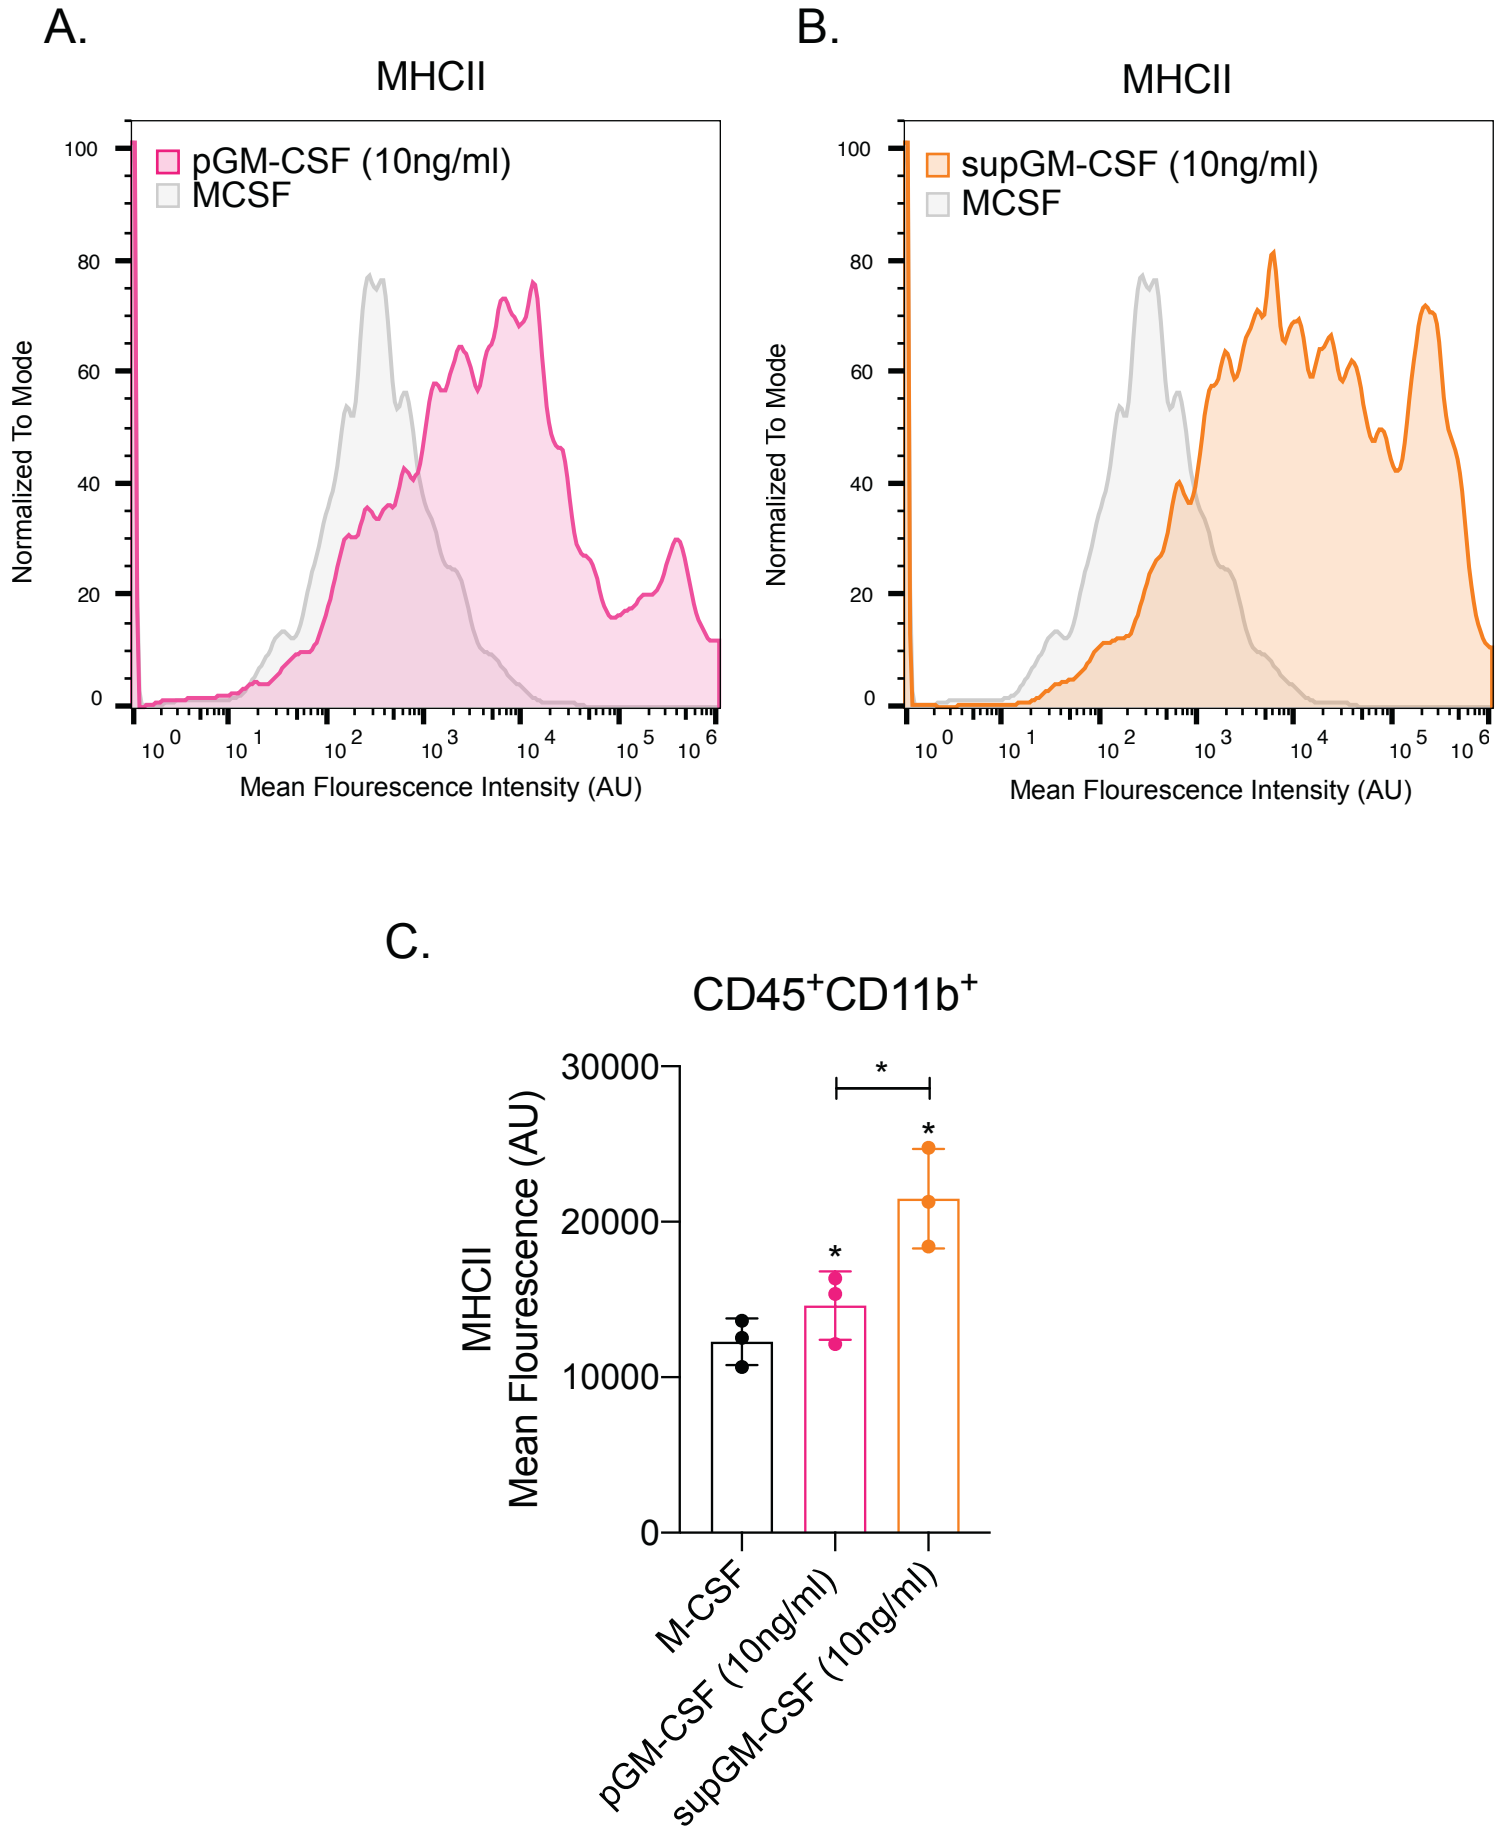

Supplemental Table 1: Cost of purified murine GM-CSF

|                 | Biologend           |        |        | Abcam               | Millipore Sigma     |          |        | Thermo Fischer      |         |         |         |          | Gold Biotechnology  |            |             |             |             |              |
|-----------------|---------------------|--------|--------|---------------------|---------------------|----------|--------|---------------------|---------|---------|---------|----------|---------------------|------------|-------------|-------------|-------------|--------------|
| <i>ug</i>       | 10                  | 100    | 500    | 20                  | 5                   | 20       | 50     | 2                   | 10      | 25      | 100     | 1000     | 5                   | 20         | 100         | 250         | 500         | 1000         |
| <i>ng</i>       | 10000               | 100000 | 500000 | 2000                | 500                 | 2000     | 5000   | 200                 | 1000    | 2500    | 10000   | 100000   | 500                 | 2000       | 10000       | 25000       | 50000       | 100000       |
| <i>\$</i>       | 125                 | 650    | 1700   | 295                 | 248                 | 343      | 521    | 124                 | 276     | 594     | 1202    | 3885     | 78                  | 115        | 355         | 640         | 982         | 1584         |
| <i>\$/ug</i>    | 12.5                | 6.5    | 3.4    | 14.75               | 49.6                | 17.15    | 10.42  | 62                  | 27.6    | 23.76   | 12.02   | 3.885    | 15.6                | 5.75       | 3.55        | 2.56        | 1.964       | 1.584        |
| <i>Catalog</i>  |                     |        |        |                     | G0282               | SRP3201  | G0282  | PMC2014             | PMC2015 | PMC2016 | PMC2011 | PMC2013  | 1320-03-05          | 1320-03-20 | 1320-03-100 | 1320-03-250 | 1320-03-500 | 1320-03-1000 |
| <i>25ng/ml</i>  | 400                 | 4000   | 20000  | 80                  | 20                  | 80       | 200    | 8                   | 40      | 100     | 400     | 4000     | 20                  | 80         | 400         | 1000        | 2000        | 4000         |
|                 | <b>10ml per exp</b> |        |        | <b>10ml per exp</b> | <b>10ml per exp</b> |          |        | <b>10ml per exp</b> |         |         |         |          | <b>10ml per exp</b> |            |             |             |             |              |
| <i>No./Exp</i>  | 40                  | 400    | 2000   | 8                   | 2                   | 8        | 20     | 0.8                 | 4       | 10      | 40      | 400      | 2                   | 8          | 40          | 100         | 200         | 400          |
| <i>Cost/Exp</i> | 3.125               | 1.625  | 0.85   | 36.875              | 124                 | 42.875   | 26.05  | 155                 | 69      | 59.4    | 30.05   | 9.7125   | 39                  | 14.375     | 8.875       | 6.4         | 4.91        | 3.96         |
|                 | <b>25ml per exp</b> |        |        | <b>25ml per exp</b> | <b>25ml per exp</b> |          |        | <b>25ml per exp</b> |         |         |         |          | <b>25ml per exp</b> |            |             |             |             |              |
| <i>No./Exp</i>  | 16                  | 160    | 800    | 3.2                 | 0.8                 | 3.2      | 8      | 0.32                | 1.6     | 4       | 16      | 160      | 0.8                 | 3.2        | 16          | 40          | 80          | 160          |
| <i>Cost/Exp</i> | 7.8125              | 4.0625 | 2.125  | 92.1875             | 310                 | 107.1875 | 65.125 | 387.5               | 172.5   | 148.5   | 75.125  | 24.28125 | 97.5                | 35.9375    | 22.1875     | 16          | 12.275      | 9.9          |
|                 | <b>50ml per exp</b> |        |        | <b>50ml per exp</b> | <b>50ml per exp</b> |          |        | <b>50ml per exp</b> |         |         |         |          | <b>50ml per exp</b> |            |             |             |             |              |
| <i>No./Exp</i>  | 8                   | 80     | 400    | 1.6                 | 0.4                 | 1.6      | 4      | 0.16                | 0.8     | 2       | 8       | 80       | 0.4                 | 1.6        | 8           | 20          | 40          | 80           |
| <i>Cost/Exp</i> | 15.625              | 8.125  | 4.25   | 184.375             | 620                 | 214.375  | 130.25 | 775                 | 345     | 297     | 150.25  | 48.5625  | 195                 | 71.875     | 44.375      | 32          | 24.55       | 19.8         |
